# 1 Deciphering Bedaquiline and Clofazimine Resistance in Tuberculosis: 2 An Evolutionary Medicine Approach

3 Lindsay Sonnenkalb<sup>\*,1</sup>, Joshua Carter<sup>\*,2</sup>, Andrea Spitaleri<sup>5,6</sup>, Zamin Iqbal<sup>7</sup>, Martin Hunt<sup>7,8</sup>, Kerri Malone<sup>7</sup>,  
4 Christian Utpatel<sup>1</sup>, Daniela Maria Cirillo<sup>5</sup>, Camilla Rodrigues<sup>9</sup>, Kayzad S. Nilgiriwala<sup>10</sup>, the CRyPTIC  
5 Consortium<sup>11</sup>, Philip W. Fowler<sup>&,8</sup>, Matthias Merker<sup>&,1</sup>, Stefan Niemann<sup>&,1,3,4</sup>

6

## 7 **Affiliations**

8 <sup>1</sup>Molecular and Experimental Mycobacteriology, Research Center Borstel Leibniz Lung Center, Borstel  
9 Germany

10 <sup>2</sup>Medical Scientist Training Program, Stanford University, Stanford, USA

11 <sup>3</sup>National Reference Center, Research Center Borstel Leibniz Lung Center, Borstel Germany

12 <sup>4</sup>German Centre for Infection Research (DZIF), Partner site Hamburg-Lübeck-Borstel, Borstel, Germany

13 <sup>5</sup>Emerging Bacterial Pathogens Unit, Division of Immunology, Transplantation and Infectious Diseases,  
14 IRCCS San Raffaele Scientific Institute, Milan, Italy

15 <sup>6</sup>Center for Omics Sciences, IRCCS San Raffaele Scientific Institute, Milan, Italy

16 <sup>7</sup>European Bioinformatics Institute, Cambridge, UK.

17 <sup>8</sup>Experimental Medicine, Nuffield Department of Medicine, University of Oxford, UK

18 <sup>9</sup>Department of Microbiology, P. D. Hinduja National Hospital and Medical Research Centre, Mumbai,  
19 India

20 <sup>10</sup>The Foundation for Medical Research, Mumbai, India

21 <sup>11</sup>Comprehensive Resistance Prediction for Tuberculosis: an International Consortium. Author list in  
22 supplement.

23 <sup>\*</sup>equally contributing first authors

24 <sup>&</sup>equally contributing last authors

25 <sup>\*</sup>Corresponding author, email: [sniemann@fz-borstel.de](mailto:sniemann@fz-borstel.de)

26

27 **Abstract**

28 Bedaquiline (BDQ) and clofazimine (CFZ) are core drugs for treatment of multidrug resistant tuberculosis  
29 (MDR-TB), however, our understanding of the resistance mechanisms for these drugs is sparse which is  
30 hampering rapid molecular diagnostics. To address this, we employed a unique approach using  
31 experimental evolution, protein modelling, genome sequencing, and minimum inhibitory concentration  
32 data combined with genomes from a global strain collection of over 14,151 *Mycobacterium tuberculosis*  
33 complex isolates and an extensive literature review. Overall, 230 genomic variants causing elevated BDQ  
34 and/or CFZ MICs could be discerned, with 201 (87.4%) variants affecting the transcriptional repressor  
35 (Rv0678) of an efflux system (mmpS5-mmpL5). Structural modelling of Rv0678 suggests four major  
36 mechanisms that confer resistance: impairment of DNA binding, reduction in protein stability, disruption  
37 of protein dimerization, and alteration in affinity for its fatty acid ligand. These modelling and  
38 experimental techniques will improve personalized medicine in an impending drug resistant era.

39

## 40 **Introduction**

41 Multidrug-resistant (MDR: resistance to at least isoniazid [INH] and rifampicin [RMP]) Mycobacterium  
42 tuberculosis complex (Mtb) strains represent a serious challenge for global tuberculosis (TB) control <sup>1,2</sup>.  
43 The World Health Organization (WHO) estimates that close to half a million people worldwide were  
44 infected in 2019 with an RMP-resistant (RR) Mtb strain, of whom 78% were MDR <sup>1</sup>.

45 Compared to patients with sensitive TB, treating MDR-TB treatment takes longer (years), the drugs are  
46 less effective and more toxic, and cure rates are low (about 60% globally) <sup>1,3</sup>. As a consequence, ineffective  
47 MDR-TB regimens in many high incidence settings have led to an expansion of drug resistant Mtb strains.  
48 The WHO has recommended new treatment regimens for MDR-TB, including new and repurposed drugs  
49 such as bedaquiline (BDQ) and clofazimine (CFZ) <sup>4-7</sup>. Both drugs are now central to MDR-TB therapy, and  
50 are also part of the recently WHO-endorsed shorter, all-oral MDR-TB regimen <sup>7,8</sup>.

51 Selection experiments have found resistance to BDQ and or CFZ as mediated by mutations in the genes  
52 *atpE*, *pepQ*, *Rv1979c* <sup>9-11</sup>, and *Rv0678* - the latter of which seems to be the most clinically relevant and  
53 strains with BDQ associated mutations in *Rv0678* and *atpE* have been selected in multiple patients<sup>12-17</sup>.  
54 *Rv0678* is a marR-like transcriptional regulator of the *mmpS5-mmpL5* efflux pump with a canonical N-  
55 terminal winged helix-turn-helix (wHTH) DNA binding domain and a C-terminal helical dimerization  
56 domain. The *Rv0678* protein forms a homodimer which binds to the promoter region of the *mmpS5-*  
57 *mmpL5* operon <sup>18-21</sup>. This repression is reversed upon the conformational change of the *Rv0678* molecule  
58 in the presence of a fatty acid ligand <sup>20</sup>. Importantly, Mtb strains with mutations in *Rv0678* have been  
59 shown to confer resistance against both BDQ and CFZ <sup>22,23</sup>, thus undermining the recently WHO-endorsed  
60 treatment guidelines <sup>8</sup>. Moreover, mutations in *Rv0678* are the most common resistance mechanism to  
61 CFZ and BDQ found in patient isolates today <sup>16,17,24-29</sup>.

62 So far, mutations scattered across the full gene length of *Rv0678* (498bp) have been found to occur *in*  
63 *vitro* and in patients isolates leading to variable shifts in BDQ and CFZ minimum inhibitory concentrations  
64 (MICs) <sup>13,29,30</sup>. However, a comprehensive understanding of the associations between *Rv0678* mutations  
65 and their resulting phenotype, as well as their structural effects on the transcriptional repressor *Rv0678*,  
66 is lacking.

67 In this paper we present the results of an experimental model that evolves Mtb strains under sub-lethal  
68 drug concentrations. Such a weak selection pressure has been shown to select for diverse pheno- and  
69 genotypes in other bacterial species and likely also reflects the physiological conditions in TB patients<sup>31-</sup>  
70<sup>33</sup>. Recent studies indicate the inability of most drugs to diffuse into the granuloma at therapeutic levels,  
71 including CFZ and BDQ which strongly bind caseum macromolecules<sup>34-38</sup>. BDQ has further been shown to  
72 accumulate in cellular compartments of various types of macrophages (including neutrophils), but was  
73 unevenly distributed in intracellular bacteria<sup>39,40</sup>. Single resistant clones and total bacterial populations  
74 from consecutive cultivation passages were selected at clinically relevant drug concentrations, analyzed  
75 by whole genome sequencing (WGS), and compared with mutations identified in 14,151 patient isolates  
76 collected by the CRyPTIC consortium. Selected mutations were further investigated computationally for  
77 their putative effects on the Rv0678 protein structure and function, which provides a starting point for  
78 design of computational algorithms to predict drug resistance. The data generated provide a  
79 comprehensive resistance mutation catalogue for genotypic BDQ/CFZ drug susceptibility testing and will  
80 improve MDR-TB treatment design and likely outcomes for patients receiving a BDQ and/or CFZ  
81 containing therapies.

## 82 **Results**

### 83 **Experimental evolution under sub-lethal drug concentrations**

84 To better understand the resistance mechanisms of Mtb strains against BDQ (which often includes  
85 correlated resistance to CFZ), we evolved Mtb strains under sub-lethal drug concentrations. The  
86 experimental set-up was developed to allow for a high number of bacterial generations under a moderate  
87 drug selection pressure, thus increasing the mutation diversity compared to classical mutant selection  
88 experiments, i.e. exposing a culture at a late exponential phase to the critical drug concentrations (Figure  
89 S1). Our H37Rv laboratory strain (ATCC 27294) MIC was 0.25 mg/L for BDQ and 0.5 mg/L for CFZ, in high  
90 bacterial density liquid culture ( $10^7$  CFU/mL inoculum) – we shall refer to these as the wild-type (WT)  
91 MICs. During five culture passages spread over 20 days, we exposed H37Rv to either BDQ or CFZ at one of  
92 four concentrations, ranging from one-half to one-sixteenth of the WT MIC (Figure S2), and selected  
93 colonies on solid media (7H11 plates) supplemented with 0.12 mg/L (1:2 MIC) and 0.25 mg/L (MIC) for  
94 BDQ and 0.25 mg/L (1:2 MIC) for CFZ. At passages 1, 3, and 5, single colonies as well as the whole bacterial

95 population were genotypically characterized, and single selected mutations were phenotypically defined  
 96 (elevated MIC) (Tables 1, S1).

97 Strikingly, exposure to BDQ or CFZ concentrations as low as one-eighth of the WT MIC over 20 days (12 to  
 98 19 generations) led to the selection and enrichment of significantly more resistant cells as compared to  
 99 growth in the absence of the drugs ( $P=2.8 \times 10^{-10}$ , and  $P=2.4 \times 10^{-3}$ , respectively, Figure S2). As expected,  
 100 there was less enrichment of resistant populations at early timepoints, e.g. after 4 days.

101 **Table 1: *In vitro* selected mutations conferring BDQ resistance.** Genotype of each variant was determined  
 102 by whole genome sequencing, and substitution annotated by coding position, “alternative allele” denotes  
 103 base pair change. Minimum inhibitory concentration (MIC) was determined by resazurin microtiter plate  
 104 assay and compared to wild type (WT) susceptible ancestor to describe MIC fold increase. The number of  
 105 times a mutation was independently selected was included under “# of clones”. Finally, from which  
 106 experiment (BDQ or CFZ) the mutant was isolated from included as “isolate from”.

| Gene   | Position    | Substitution | Type  | Alt. allele | # of clones | BDQ MIC (mg/L) | BDQ MIC fold increase | CFZ MIC (mg/L) | CFZ MIC fold increase | Isolated from | Drug concentration of selection media (mg/L) |
|--------|-------------|--------------|-------|-------------|-------------|----------------|-----------------------|----------------|-----------------------|---------------|----------------------------------------------|
|        | WT ancestor |              |       |             |             | 0.25-0.5       |                       | 0.5-1          |                       |               |                                              |
| Rv0678 | 778980      | promotor     | indel | -9 ins g    | 1           | 2              | 4-8                   | 1              | 0-2                   | BDQ           | 0.12                                         |
| Rv0678 | 779005      | 6fs          | indel | 16 del g    | 1           | 1              | 2-4                   | 2              | 2-4                   | BDQ           | 0.12                                         |
| Rv0678 | 779015      | 9fs          | indel | 26 del ag   | 1           | 2              | 4-8                   | NA             | NA                    | BDQ           | 0.12                                         |
| Rv0678 | 779029      | 14fs         | indel | 40 del c    | 1           | 2              | 4-8                   | 2              | 2-4                   | BDQ           | 0.12                                         |
| Rv0678 | 779038      | 17fs         | indel | 49 del a    | 1           | 2              | 4-8                   | 2              | 2-4                   | CFZ           | 0.25                                         |
| Rv0678 | 779051      | 21fs         | indel | 62 del a    | 1           | 2              | 4-8                   | 1              | 0-2                   | BDQ           | 0.12                                         |
| Rv0678 | 779060      | G24V         | SNP   | T           | 3           | 2              | 4-8                   | 2              | 2-4                   | CFZ           | 0.25                                         |
| Rv0678 | 779062      | G25S         | SNP   | A           | 1           | 2              | 4-8                   | NA             | NA                    | BDQ           | 0.25                                         |
| Rv0678 | 779078      | 30fs         | indel | 89 del g    | 1           | 2              | 4-8                   | 2              | 2-4                   | CFZ           | 0.25                                         |

|        |        |       |       |           |    |     |      |     |      |         |                    |
|--------|--------|-------|-------|-----------|----|-----|------|-----|------|---------|--------------------|
| Rv0678 | 779101 | R38*  | SNP   | T         | 4  | 2   | 4-8  | 2   | 2-4  | CFZ     | 0.25               |
| Rv0678 | 779102 | R38P  | SNP   | C         | 1  | 1   | 2-4  | 2   | 2-4  | CFZ     | 0.25               |
| Rv0678 | 779108 | L40S  | SNP   | C         | 1  | 1   | 2-4  | 2   | 2-4  | CFZ     | 0.25               |
| Rv0678 | 779109 | 40fs  | indel | 120 del g | 1  | 1   | 2-4  | 2   | 2-4  | CFZ     | 0.25               |
| Rv0678 | 779117 | L43P  | SNP   | C         | 5  | 1-2 | 2-8  | 2   | 2-4  | BDQ/CFZ | 0.12 / 0.25        |
| Rv0678 | 779117 | L43R  | SNP   | G         | 1  | 1   | 2-4  | 2   | 2-4  | BDQ     | 0.12               |
| Rv0678 | 779120 | L44P  | SNP   | C         | 4  | 1   | 2-4  | 2   | 2-4  | CFZ     | 0.25               |
| Rv0678 | 779137 | R50W  | SNP   | T         | 12 | 1   | 2-4  | 2   | 2-4  | CFZ     | 0.25               |
| Rv0678 | 779141 | Q51R  | SNP   | G         | 2  | 2   | 4-8  | 4   | 4-8  | CFZ     | 0.25               |
| Rv0678 | 779149 | E54*  | SNP   | T         | 1  | 2   | 4-8  | 2   | 2-4  | CFZ     | 0.25               |
| Rv0678 | 779152 | E55*  | SNP   | T         | 1  | 1   | 2-4  | 2   | 2-4  | CFZ     | 0.25               |
| Rv0678 | 779159 | A57E  | SNP   | A         | 1  | 2   | 4-8  | 2   | 2-4  | CFZ     | 0.25               |
| Rv0678 | 779174 | A62D  | SNP   | A         | 1  | 2   | 4-8  | 2   | 2-4  | CFZ     | 0.25               |
| Rv0678 | 779176 | S63G  | SNP   | G         | 5  | 2   | 4-8  | 2   | 2-4  | CFZ     | 0.25               |
| Rv0678 | 779181 | 64fs  | indel | 192 ins g | 20 | 1-4 | 2-16 | 2-4 | 2-8  | BDQ/CFZ | 0.12 / 0.25        |
| Rv0678 | 779182 | 65fs  | indel | 193 del g | 12 | 1-2 | 2-8  | 2-4 | 2-8  | BDQ/CFZ | 0.12 & 0.25 / 0.25 |
| Rv0678 | 779186 | G66E  | SNP   | A         | 1  | 2   | 4-8  | 1   | 0-2  | BDQ     | 0.12               |
| Rv0678 | 779191 | S68G  | SNP   | G         | 9  | 1-2 | 2-8  | 2   | 2-4  | BDQ/CFZ | 0.12 / 0.25        |
| Rv0678 | 779203 | R72W  | SNP   | T         | 2  | 1-2 | 2-8  | 2   | 2-4  | CFZ     | 0.25               |
| Rv0678 | 779204 | R72L  | SNP   | T         | 2  | 2-4 | 4-16 | 4-6 | 4-12 | BDQ     | 0.12               |
| Rv0678 | 779210 | L74P  | SNP   | C         | 8  | 1-2 | 2-8  | 2-4 | 2-8  | BDQ/CFZ | 0.12 / 0.25        |
| Rv0678 | 779217 | 76fs  | indel | 228 ins t | 1  | 2   | 4-8  | NA  | NA   | BDQ     | 0.12               |
| Rv0678 | 779224 | F79V  | SNP   | G         | 1  | 1   | 2-4  | 2   | 2-4  | CFZ     | 0.25               |
| Rv0678 | 779225 | F79C  | SNP   | G         | 2  | 1   | 2-4  | 2   | 2-4  | BDQ     | 0.12               |
| Rv0678 | 779240 | A84V  | SNP   | T         | 2  | 1-2 | 2-8  | 1-2 | 0-4  | BDQ     | 0.12               |
| Rv0678 | 779252 | 88fs  | indel | 263 ins t | 1  | 2   | 4-8  | 1   | 0-2  | BDQ     | 0.12               |
| Rv0678 | 779263 | 92fs  | indel | 274 ins a | 3  | 1   | 2-4  | 2   | 2-4  | CFZ     | 0.25               |
| Rv0678 | 779270 | 94fs  | indel | 281 del g | 1  | 2   | 4-8  | 2   | 2-4  | CFZ     | 0.25               |
| Rv0678 | 779280 | 97fs  | indel | 291 ins a | 2  | 2   | 4-8  | 2   | 2-4  | CFZ     | 0.25               |
| Rv0678 | 779281 | 98fs  | indel | 292 del g | 1  | 2   | 4-8  | 2   | 2-4  | BDQ     | 0.12               |
| Rv0678 | 779285 | A99V  | SNP   | T         | 16 | 1-2 | 2-8  | 1-2 | 0-4  | BDQ/CFZ | 0.12 / 0.25        |
| Rv0678 | 779293 | A102T | SNP   | A         | 4  | 1-4 | 2-16 | 2-4 | 2-8  | BDQ     | 0.12               |

|        |         |       |           |                                                 |   |       |      |     |     |         |                    |
|--------|---------|-------|-----------|-------------------------------------------------|---|-------|------|-----|-----|---------|--------------------|
| Rv0678 | 779296  | G103R | SNP       | C                                               | 1 | 1     | 2-4  | 2   | 2-4 | BDQ     | 0.12               |
| Rv0678 | 779330  | L114P | SNP       | C                                               | 1 | 2     | 4-8  | 2   | 2-4 | CFZ     | 0.25               |
| Rv0678 | 779332  | Q115* | SNP       | T                                               | 1 | 2     | 4-8  | 2   | 2-4 | BDQ     | 0.12               |
| Rv0678 | 779342  | A118D | SNP       | C                                               | 1 | 1     | 2-4  | 2   | 2-4 | CFZ     | 0.25               |
| Rv0678 | 779349  | 120fs | indel     | 360 del g                                       | 7 | 1-4   | 2-16 | 2-4 | 2-8 | BDQ/CFZ | 0.12 / 0.25        |
| Rv0678 | 779351  | G121E | SNP       | A                                               | 3 | 2     | 4-8  | 2-4 | 2-8 | CFZ     | 0.25               |
| Rv0678 | 779354  | L122P | SNP       | C                                               | 1 | 2     | 4-8  | 2   | 2-4 | CFZ     | 0.25               |
| Rv0678 | 779363  | 125fs | indel     | 374 del t                                       | 1 | 2     | 4-8  | 2   | 2-4 | BDQ     | 0.12               |
| Rv0678 | 779363  | L125P | SNP       | C                                               | 1 | 2     | 4-8  | 2   | 2-4 | CFZ     | 0.25               |
| Rv0678 | 779384  | R132P | SNP       | C                                               | 1 | 2     | 4-8  | 2   | 2-4 | CFZ     | 0.25               |
| Rv0678 | 779392  | R135W | SNP       | T                                               | 1 | 2     | 4-8  | 2   | 2-4 | BDQ     | 0.12               |
| Rv0678 | 779396  | L136P | SNP       | C                                               | 2 | 2     | 4-8  | 2-4 | 2-8 | BDQ     | 0.12               |
| Rv0678 | 779406  | 139fs | indel     | 417 ins<br>CGGG<br>ATCTG<br>TTGGC<br>ATATA<br>T | 2 | 1-2   | 2-8  | 2   | 2-4 | BDQ     | 0.12               |
| Rv0678 | 779414  | 142fs | indel     | 425 del t                                       | 1 | 2     | 4-8  | 2   | 2-4 | CFZ     | 0.25               |
| Rv0678 | 779415  | 142fs | indel     | 426 ins<br>TTGGC<br>ATA                         | 1 | 2     | 4-8  | NA  | NA  | BDQ     | 0.12               |
| Rv0678 | 779424  | Y145* | SNP       | G                                               | 6 | 1-2   | 2-8  | 2   | 2-4 | BDQ/CFZ | 0.12 & 0.25 / 0.25 |
| Rv0678 | 779440  | S151P | SNP       | C                                               | 1 | 2     | 4-8  | 2   | 2-4 | BDQ     | 0.12               |
| Rv0678 | 779450  | L154P | SNP       | C                                               | 2 | 2     | 4-8  | 2   | 2-4 | CFZ     | 0.25               |
| Rv0678 | 779454  | 155fs | indel     | 465 ins<br>c                                    | 2 | 1-2   | 2-8  | 2   | 2-4 | CFZ     | 0.25               |
| Rv0678 | 779455  | R156* | SNP       | T                                               | 3 | 2     | 4-8  | 2   | 2-4 | BDQ/CFZ | 0.12 & 0.25 / 0.25 |
| Rv0678 | -       | -     | inversion | -                                               | 3 | 2     | 4-8  | 2   | 2-4 | BDQ     | 0.12               |
| Rv1305 | 1461127 | D28G  | SNP       | G                                               | 1 | ≥10   | 20   | NA  | NA  | BDQ     | 0.25               |
| Rv1305 | 1461127 | D28V  | SNP       | T                                               | 3 | ≥8    | 16   | NA  | NA  | BDQ     | 0.25               |
| Rv1305 | 1461227 | E61D  | SNP       | C                                               | 5 | 2-≥10 | 4-40 | 1   | 0-2 | BDQ     | 0.25               |
| Rv1305 | 1461227 | E61D  | SNP       | T                                               | 2 | ≥10   | 20   | 1-2 | 0-4 | BDQ     | 0.12 & 0.25        |
| Rv1305 | 1461231 | A63P  | SNP       | C                                               | 7 | ≥10   | 20   | 1-2 | 0-4 | BDQ     | 0.25               |

107 Alt- alternative, BDQ- bedaquiline, CFZ- clofazimine, del- deletion, fs- frameshift, ins- insertion, MIC-  
 108 minimum inhibitory concentration, NA- not available, SNP- single nucleotide polymorphism, \*-stop codon

## 109 **Phenotypic and genotypic characterization of BDQ resistant mutants**

110 In total, we randomly selected 270 single colonies from BDQ- and CFZ-supplemented agar plates that had  
111 been inoculated with samples from passages 1 (4 days), 3 (12 days), and 5 (20 days), of two independent  
112 experiments (Figure S1). In total, 203/270 mutants were successfully pheno- and genotyped (67 were  
113 excluded due to DNA library preparation issues or inadequate growth). The single colonies were sub-  
114 cultured and the MICs for BDQ and CFZ were determined for each clone using broth microtiter dilution.  
115 All clones exhibited an elevated MIC at least 2-fold higher than the WT drug susceptible ancestor and we  
116 identified in total 61 unique variants with one mutation in the *Rv0678* gene per clone. We additionally  
117 selected five unique mutations in the *atpE* (*Rv1305*) gene (Table 1).

118 Clones which harbored a mutation in *Rv0678* had a 2-4-fold MIC increase for BDQ, whereas mutations in  
119 *atpE*, exhibited 4 to over 10 times the MIC of the WT strain (Table 1). For 12 randomly selected clones  
120 with seven different variants we verified the results obtained in broth microtiter dilution plates using a  
121 Mycobacterium growth indicator tube (MGIT) assay. These experiments showed comparable MICs of the  
122 mutant clones with those obtained from the previous method (Table S2).

123 The 61 unique mutations in *Rv0678* affected 54 different codons (Table 1), out of which 21 (34%) were  
124 frameshift (fs) mutations, 34 (56%) had one non-synonymous SNP, and 6 (10%) a premature inserted stop  
125 codon. The mutations were scattered over the entire sequence of *Rv0678* and no dominant cluster could  
126 be identified (Figure 1A). However, the four mutations which were most frequently observed were: 192  
127 ins g (64fs), A99V, 193 del g (65fs), and R50W; these mutations were detected in 19, 17, 13, and 12 single  
128 selected clones, respectively (Table 1). Notably, nucleotides 192-198 were also identified as a hotspot for  
129 frameshifting variation in a prior review, potentially due to the homopolymeric nature of this region<sup>41</sup>.



## A. *In vitro* variants

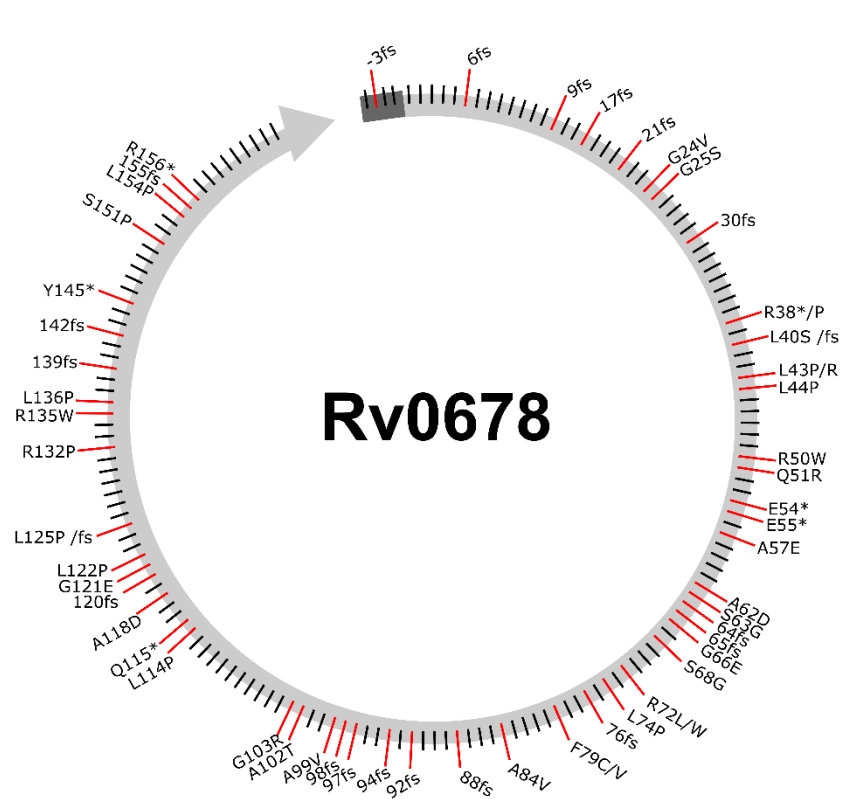

## B. Patient isolate variants

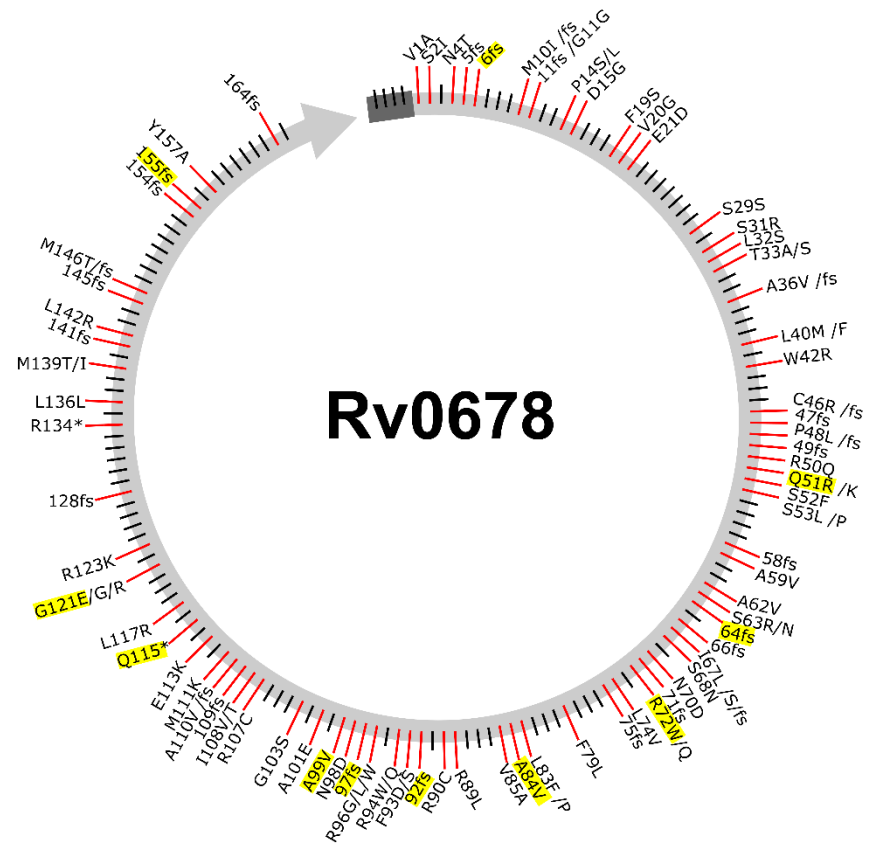

130

131 **Figure 1: BDQ resistance associated variants mapped in *Rv0678* gene.** Resistance associated mutations detected within patient dataset and *in vitro*  
 132 selection were designated along *Rv0678* gene at corresponding coding positions by non-synonymous single nucleotide polymorphisms, and by a  
 133 protein disrupting mutation such as a stop codon insertion (\*) or frameshift (fs) mutations. Data sets divided by (A) mutations which were selected in  
 134 *in vitro* experiments with elevated minimum inhibitory concentrations verified to bedaquiline, and (B) mutations which were detected in patient  
 135 isolates either collected by CRYPTIC or described in published literature. Overlapping mutations in observed in both patients and *in vitro* are  
 136 highlighted in yellow.

137 As mentioned before, no mutant clone had more than one resistance mediating variant in *Rv0678* or *atpE*,  
138 however, 38 mutants harbored a second mutation in one of 14 genes that have not been previously  
139 proposed to be associated with resistance against BDQ and/or CFZ (Table S3). The most common mutation  
140 found in addition to *Rv0678* mutations was R119H in *Rv1890c* – this gene codes for a conserved  
141 hypothetical protein <sup>42</sup>, and the mutation was selected 11 times along with six different resistance  
142 mutations. The second most common co-selected mutation was \*130R in *Rv1871c* (a conserved  
143 hypothetical membrane protein <sup>43</sup>) that was selected seven times along with four different resistance  
144 mutations. Other secondary mutations occurred in genes which were involved in cell wall synthesis,  
145 information pathways, metabolism/respiration, protein regulation, or lipid metabolism (Table S3).

146 In addition to single colony sequencing, we also employed a more unbiased approach based on population  
147 sequencing of all the mutant colonies on a given plate, in order to elucidate all possible variants. On  
148 average the genome wide coverage for a total of 81 samples was 308±50. We then reported mutations if  
149 the position was covered by at least one read in both forward and reverse orientations and there were  
150 two reads with a phred score over 20. This identified 45 additional mutations in *Rv0678* and one in *atpE*  
151 (A63T), as well as four mutations in *pepQ* (*Rv2535c*; F97V, G96G, V92G, A87G) (Table S1). As in the single  
152 colony analysis, we found the following mutations dominating in different independent evolutionary  
153 experiments and selected across different drug concentrations: *Rv0678* 192 ins g (64fs), A99V, R50W, and  
154 L43P.

### 155 **Resistance caused by huge inversion interruption in *Rv0678***

156 Three mutants with elevated BDQ (2 mg/L) and CFZ (2 mg/L) MICs but lacking mutations in the BDQ/CFZ  
157 resistance associated genes were further subjected to long read sequencing with the PacBio Sequel II  
158 system. A *de novo* assembly employing the PacBio SMRT® Link software resulted in one closed Mtbc  
159 genome, and two assemblies with 1 and 4 four contiguous sequences (contigs), respectively. All  
160 assemblies covered more than 99.9% of the H37Rv reference genome (NC\_000962.3). All three assemblies  
161 showed a large-scale sequence re-arrangement with the borders at position 779,073 (*Rv0678* coding  
162 sequence) and 3,552,584 (intergenic region), flanked by a transposase open reading frame (*IS6110*). A  
163 2.5Mb fragment was inverted and thus split the *Rv0678* gene into halves (Figure 2), which was not  
164 detected by a classical reference mapping approach and revealed a further interesting resistance  
165 mechanism. We scanned all BDQ resistant samples in the CRyPTIC strain collection for similar events using

166 local assembly with ARIBA<sup>44</sup>. In one isolate we assembled one contig which clearly represented a similar  
167 inversion disrupting *Rv0678*, but since the depth of support was just 1 read (mean, across the contig) and  
168 this was Illumina (short read) data, we considered this only circumstantial evidence.

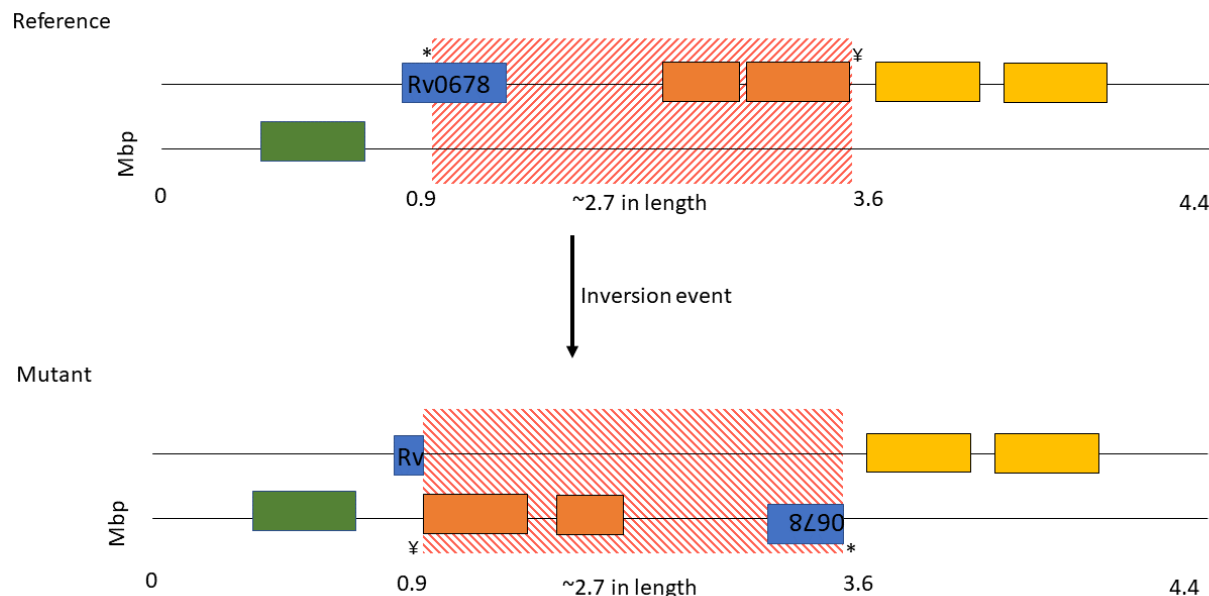

169  
170 **Figure 2: Large scale gene rearrangement in *Rv0678* gene.** *De novo* assembly using PacBio SMRT® Link  
171 software indicated a 2.7 Mb inversion (red) impacting *Rv0678* (blue), at positions 779,073 coding  
172 sequence (amino acid 34 in *Rv0678*) and 3,552,584 intergenic region; flanked by transposase related  
173 genes (orange and yellow).

#### 174 **Mutations associated with bedaquiline and clofazimine resistance in clinical isolates**

175 Next, we aimed to comprehensively describe the BDQ and CFZ resistant variants occurring in patients, to  
176 develop a catalogue of known resistance variants. We searched the literature for patient reports  
177 describing BDQ resistance during MDR-TB therapy and analyzed pheno- and genotypes of 14,151 clinical  
178 Mtbc strains collected by the CRyPTIC consortium (Table S4). In this patient dataset, we identified 98  
179 mutations throughout *Rv0678*, 71 of which were not previously described in patients (Table 2). In addition,  
180 seven variants in *Rv0678* harbored mutations found in different lineages (Table S4), pointing to  
181 convergent evolution at these sites. Eleven mutations from the patient-derived set were also shared with  
182 our *in vitro* derived datasets (selected variants and population sequencing) (Figure 1B & 3A).

183 **Table 2: Rv0678 mutations detected in patients (published literature and CRyPTIC collection).** Reference  
 184 catalog of Rv0678 mutations which have been described in previously published patient isolates or  
 185 collected by the Comprehensive Resistance Prediction for Tuberculosis an International Consortium  
 186 (CRyPTIC) partners. Additionally, alternative (Alt.) allele information included, describes the variants at  
 187 the base pair position. Variants included in list if presented a borderline or resistant phenotype to at least  
 188 bedaquiline (BDQ)MIC determined by different drug susceptibility testing (DST) techniques depending on  
 189 the study, abbreviated as: [A] BD-MGIT™, [B] UKMYC5/UKMYC6 plates, [C] Alamar blue/resazurin assay,  
 190 [D] 7H10 plates, [E] 7H11 plates

191 Phenotype interpretation was based off of: [A] 1mg/L BDQ/CFZ<sup>45</sup>; [B] 0.12-0.25mg/L BDQ/CFZ<sup>46</sup>, [C]  
 192 defined by study authors, [D] 0.5mg/L BDQ<sup>47</sup>/CFZ<sup>48</sup>, [E] 0.25 mg/L BDQ<sup>45</sup> -CFZ determined by study authors

| Gene   | Substitution | Alt Allele | Type  | BDQ MIC (mg/L)   | CFZ MIC (mg/L) | Phenotype interpretation on BDQ- R, B, S | Phenotype interpretation on CFZ- R, B, S | DST Method      | Author                    |
|--------|--------------|------------|-------|------------------|----------------|------------------------------------------|------------------------------------------|-----------------|---------------------------|
| Rv0678 | V1A          | c          | SNP   | 6.4/0.5          | >4/NA          | R/B                                      | R                                        | [A]             | <sup>24, 25</sup>         |
| Rv0678 | S2I          | t          | SNP   | 0.73             | 4              | R                                        | R                                        | [C]             | <sup>28</sup>             |
| Rv0678 | N4T          | acc        | SNP   | 0.06-0.12        | 0.12           | S/B                                      | B                                        | [B]             | CRyPTIC                   |
| Rv0678 | 5fs          | 15 del c   | indel | 0.5              | 0.25           | R                                        | R                                        | [B]             | CRyPTIC                   |
| Rv0678 | 6fs          | 18 del gg  | indel | 0.5              | NA             | R                                        | NA                                       | [E]             | <sup>49</sup>             |
| Rv0678 | 6fs          | 16 del gg  | indel | 0.5              | NA             | R                                        | NA                                       |                 | <sup>50</sup>             |
| Rv0678 | 10fs         | 28 del t   | indel | 0.12             | ≤0.06          | B                                        | S                                        | [B]             | CRyPTIC                   |
| Rv0678 | 10fs         | 29 del t   | indel | 0.25             | 0.12           | R                                        | B                                        | [B]             | CRyPTIC                   |
| Rv0678 | M10I         | atc        | SNP   | 0.12             | NA             | B                                        | NA                                       | [B]             | CRyPTIC                   |
| Rv0678 | 11fs         | 32 del g   | indel | 0.25             | NA             | R                                        | NA                                       | [E]             | <sup>51</sup>             |
| Rv0678 | G11G         | t          | SNP   | 0.5-2.0          | NA             | R                                        | NA                                       | [C]             | <sup>52</sup>             |
| Rv0678 | P14S         | tcc        | SNP   | 0.25             | 0.5            | R                                        | R                                        | [B]             | CRyPTIC                   |
| Rv0678 | P14L         | ctc        | SNP   | 0.12             | ≤0.06          | B                                        | S                                        | [B]             | CRyPTIC                   |
| Rv0678 | D15G         | NA         | SNP   | 0.25             | NA             | R                                        | NA                                       | [B]             | CRyPTIC                   |
| Rv0678 | F19S         | tcc        | SNP   | 0.5              | NA             | R                                        | NA                                       | [B]             | CRyPTIC                   |
| Rv0678 | V20G         | NA         | SNP   | 0.25/2/0.25/0.25 | NA/2/NA/4      | R/B                                      | R                                        | [E]/[A]/[A]/[E] | <sup>53, 53, 54, 29</sup> |
| Rv0678 | V20A         | gcc        | SNP   | 0.12             | 0.12           | B                                        | B                                        | [B]             | CRyPTIC                   |
| Rv0678 | E21D         | c          | SNP   | 0.5-1.0          | NA             | R                                        | NA                                       | [C]             | <sup>52</sup>             |
| Rv0678 | S29S         | tct        | SNP   | 0.12             | 0.12           | B                                        | B                                        | [B]             | CRyPTIC                   |
| Rv0678 | S31R         | c          | SNP   | 0.5              | NA             | R                                        | NA                                       | [C]             | <sup>52</sup>             |

|        |       |                   |       |                     |                         |     |     |                             |                                       |
|--------|-------|-------------------|-------|---------------------|-------------------------|-----|-----|-----------------------------|---------------------------------------|
| Rv0678 | L32S  | tcg               | SNP   | 0.12                | 0.12                    | B   | B   | [B]                         | CRyPTIC                               |
| Rv0678 | T33A  | g                 | SNP   | 0.5                 | 2                       | R   | R   | [C]                         | <sup>23</sup>                         |
| Rv0678 | T33S  | g                 | SNP   | 2                   | NA                      | R   | NA  | [C]                         | <sup>52</sup>                         |
| Rv0678 | A36V  | t                 | SNP   | 0.5                 | 4                       | R   | R   | [C]                         | <sup>23</sup>                         |
| Rv0678 | 36fs  | 107 ins<br>g      | indel | 0.5                 | 0.25                    | R   | R   | [B]                         | CRyPTIC                               |
| Rv0678 | L40M  | atg               | SNP   | 0.5                 | NA                      | R   | NA  | [B]                         | CRyPTIC                               |
| Rv0678 | L40F  | ttc               | SNP   | 0.5                 | NA                      | R   | R   | [B]                         | CRyPTIC                               |
| Rv0678 | W42R  | cgg               | SNP   | 0.25/0.12           | 0.25/2                  | R/B | R   | [B]/[D]                     | CRyPTIC,<br><sup>14</sup>             |
| Rv0678 | 46fs  | 136 ins<br>g      | indel | 1                   | NA                      | R   | NA  | [E]                         | <sup>54</sup>                         |
| Rv0678 | 46fs  | 137 ins<br>g      | indel | 0.25                | 1                       | R   | R   | [B]                         | CRyPTIC                               |
| Rv0678 | 46fs  | 138 ins<br>g      | indel | 0.25/0.25/2/>1/1    | 0.25/N<br>A/4/N<br>A/NA | R   | R   | [B]/[E]/<br>[A]<br>/[E]/[E] | CRyPTIC,<br><sup>53, 53, 12, 54</sup> |
| Rv0678 | 46fs  | 138 ins<br>ga     | indel | >1.0                | NA                      | R   | NA  | [E]                         | [15]                                  |
| Rv0678 | C46R  | cgt               | SNP   | 0.25                | NA                      | R   | NA  | [B]                         | CRyPTIC                               |
| Rv0678 | 47fs  | 139 ins<br>g      | indel | 0.25                | NA                      | R   | NA  | [E]                         | <sup>51</sup>                         |
| Rv0678 | 47fs  | 140 ins<br>g      | indel | 0.25                | NA                      | R   | NA  | [E]                         | <sup>49</sup>                         |
| Rv0678 | 47fs  | 141 ins<br>c      | indel | 0.06-0.25/0.5/4/0.5 | 0.06-1/NA/4/NA          | S-R | S-R | [B]/ [E]/<br>[A]/[E]        | CRyPTIC,<br><sup>53, 53, 29</sup>     |
| Rv0678 | 48fs  | 144 ins<br>c      | indel | 0.25                | NA                      | R   | NA  | [E]                         | <sup>51</sup>                         |
| Rv0678 | P48L  | NA                | SNP   | 0.25-0.5            | NA                      | R   | B   | [B]                         | CRyPTIC                               |
| Rv0678 | E49fs | NA                | indel | 0.03-0.25           | 0.25-2                  | R   | R   | [E]                         | <sup>29</sup>                         |
| Rv0678 | R50Q  | NA                | SNP   | 0.25                | NA                      | R   | NA  | [B]                         | CRyPTIC                               |
| Rv0678 | Q51K  | NA                | SNP   | 0.25                | 1                       | R   | R   | [B]                         | CRyPTIC                               |
| Rv0678 | Q51R  | NA                | SNP   | 0.3                 | 1                       | R   | R   | [B]                         | CRyPTIC                               |
| Rv0678 | S52F  | NA                | SNP   | 0.48                | NA                      | R   | NA  | [D]                         | <sup>14</sup>                         |
| Rv0678 | S53L  | NA                | SNP   | 0.25-0.4            | 2                       | R   | R   | [C]                         | <sup>28</sup>                         |
| Rv0678 | S53P  | NA                | SNP   | 0.5                 | 2-4                     | R   | R   | [C]                         | <sup>28</sup>                         |
| Rv0678 | 58fs  | 172 ins<br>IS6110 | indel | 0.5                 | 1                       | R   | R   | [C]                         | <sup>23</sup>                         |
| Rv0678 | A59V  | NA                | SNP   | 0.48                | NA                      | R   | NA  | [D]                         | <sup>14</sup>                         |
| Rv0678 | A62V  | NA                | SNP   | 0.48                | NA                      | R   | NA  | [D]                         | <sup>14</sup>                         |
| Rv0678 | A62T  | acc               | SNP   | 0.12                | 0.5                     | B   | R   | [B]                         | CRyPTIC                               |
| Rv0678 | S63R  | a                 | SNP   | 0.5                 | 1.25                    | R   | R   | [C]                         | <sup>22</sup>                         |
| Rv0678 | S63N  | a                 | SNP   | 0.25                | NA                      | R   | NA  | [C]                         | <sup>55</sup>                         |

|        |       |              |       |                         |                                     |     |     |                     |                        |
|--------|-------|--------------|-------|-------------------------|-------------------------------------|-----|-----|---------------------|------------------------|
| Rv0678 | 64fs  | 192 ins<br>g | indel | 0.03-<br>0.25/0.<br>5/4 | 0.12/N<br>A/4                       | S-R | R   | [B]/[E]/[<br>A]     | CRyPTIC,<br>53 53      |
| Rv0678 | 64fs  | 192 ins<br>c | indel | >1.0                    | NA                                  | R   | NA  | [E]                 | 12                     |
| Rv0678 | 66fs  | 198 ins<br>g | indel | 0.24-1                  | NA                                  | R   | NA  | [D]                 | 14                     |
| Rv0678 | I67L  | ctc          | SNP   | 0.5                     | 0.12                                | R   | B   | [B]                 | CRyPTIC                |
| Rv0678 | I67S  | agc          | SNP   | 0.5                     | 0.25                                | R   | R   | [B]                 | CRyPTIC                |
| Rv0678 | S68N  | aac          | SNP   | 0.5                     | 2                                   | R   | R   | [B]                 | CRyPTIC                |
| Rv0678 | N70D  | gat          | SNP   | 0.25                    | NA                                  | R   | NA  | [B]                 | CRyPTIC                |
| Rv0678 | 71fs  | 212 del<br>c | indel | 0.5                     | 1                                   | R   | R   | [C]                 | 23                     |
| Rv0678 | R72W  | NA           | SNP   | 0.06-<br>0.25           | ≤0.06-<br>>4                        | S-R | S-R | [B]                 | CRyPTIC                |
| Rv0678 | R72Q  | a            | SNP   | 0.757                   | 2.77                                | R   | R   | [C]                 | 56                     |
| Rv0678 | L74V  | gtg          | SNP   | 0.25                    | 0.12                                | R   | B   | [B]                 | CRyPTIC                |
| Rv0678 | 75fs  | 224 ins<br>a | indel | 0.24                    | NA                                  | R   | NA  | [D]                 | 14                     |
| Rv0678 | F79L  | tta          | SNP   | 0.12                    | 0.12                                | B   | B   | [B]                 | CRyPTIC                |
| Rv0678 | L83F  | NA           | SNP   | 0.5                     | NA                                  | R   | NA  | [B]                 | CRyPTIC                |
| Rv0678 | L83P  | c            | SNP   | 0.25                    | 1                                   | R   | R   | [B]                 | CRyPTIC                |
| Rv0678 | A84V  | t            | SNP   | 0.06                    | ≤0.06                               | S/R | S/R | [B]                 | CRyPTIC                |
| Rv0678 | V85A  | gcc          | SNP   | 0.25/0.<br>12           | 0.25                                | R/B | R   | [B]/[E]             | CRyPTIC,<br>51         |
| Rv0678 | R89L  | t            | SNP   | 0.12                    | 0.12                                | B   | B   | [B]                 | CRyPTIC                |
| Rv0678 | R90C  | NA           | SNP   | 0.3                     | 0.16                                |     |     | [B]                 | CRyPTIC                |
| Rv0678 | 92fs  | 274 ins<br>a | indel | 0.25/1                  | 0.5/NA                              | R   | NA  | [B]/[D]             | CRyPTIC,<br>14         |
| Rv0678 | F93D  | NA           | SNP   | 0.25                    | NA                                  | R   | NA  | [E]                 | 54                     |
| Rv0678 | F93S  | NA           | SNP   | 0.25                    | 1                                   | R   | R   | [E]                 | 29                     |
| Rv0678 | R94W  | NA           | SNP   | 2                       | 4                                   | R   | R   | [A]                 | 17                     |
| Rv0678 | R96W  | NA           | SNP   | 0.25                    | NA                                  | R   | NA  |                     | 50                     |
| Rv0678 | R96G  | ggg          | SNP   | 0.25                    | 0.25                                | R   | R   | [B]                 | CRyPTIC                |
| Rv0678 | R96L  | ctg          | SNP   | 0.25                    | NA                                  | R   | NA  | [B]                 | CRyPTIC                |
| Rv0678 | 97fs  | 291 del<br>c | indel | 0.25                    | NA                                  | R   | NA  | [E]                 | 51                     |
| Rv0678 | N98D  | gac          | SNP   | 0.25                    | ≤0.06-<br>0.12/N<br>A/0.75<br>-1/NA | R/S | S-R | [B]/[C]/[<br>A]/[C] | CRyPTIC,<br>52, 30, 55 |
| Rv0678 | A99V  | t            | SNP   | 0.25                    | NA                                  | R   | NA  | [E]                 | 51                     |
| Rv0678 | A101E | gag          | SNP   | 0.25                    | 0.12                                | R   | B   | [B]                 | CRyPTIC                |
| Rv0678 | G103S | agc          | SNP   | 0.03-<br>0.12           | 0.5                                 | B   | R   | [B]                 | CRyPTIC                |
| Rv0678 | R107C | NA           | SNP   | 0.25                    | NA                                  | R   | NA  | [B]                 | CRyPTIC                |

|        |       |               |       |                        |                        |     |     |                 |                           |
|--------|-------|---------------|-------|------------------------|------------------------|-----|-----|-----------------|---------------------------|
| Rv0678 | I108T | NA            | SNP   | 0.25                   | 0.25                   | R   | B   | [B]             | CRyPTIC                   |
| Rv0678 | I108V | gtc           | SNP   | 0.12                   | 0.25                   | B   | R   | [B]             | CRyPTIC                   |
| Rv0678 | 109fs | 325 ins<br>g  | indel | 1                      | NA                     |     |     | [C]             | CRyPTIC                   |
| Rv0678 | A110V |               | SNP   | 0.5                    | 0.5                    | B   | R   | [A]             | <sup>30</sup>             |
| Rv0678 | 110fs | 329 del<br>t  | indel | 0.12                   | ≤0.06                  | B   | S   | [B]             | CRyPTIC                   |
| Rv0678 | M111K | NA            | SNP   | 0.25                   | NA                     | R   | NA  |                 | <sup>50</sup>             |
| Rv0678 | E113K | aaa           | SNP   | 0.25                   | 0.25                   | R   | R   | [B]             | CRyPTIC                   |
| Rv0678 | Q115* | tag           | SNP   | 0.12                   | 0.25                   | B   | R   | [B]             | CRyPTIC                   |
| Rv0678 | L117R | cgg           | SNP   | 0.015-<br>0.25/1.<br>5 | 0.06-<br>0.12/4.<br>16 | S-R | S-R | [B][C]          | CRyPTIC,<br><sup>28</sup> |
| Rv0678 | G121E | a             | SNP   | 0.25                   | NA                     | R   | R   | [E]             | <sup>51</sup>             |
| Rv0678 | G121R | agg           | SNP   | 0.5/0.7<br>5           | NA/2                   | R/B | R   | [B]             | CRyPTIC                   |
| Rv0678 | G121G | gga           | SNP   | 0.25                   | 0.12                   | R   | B   | [B]             | CRyPTIC                   |
| Rv0678 | R123K | a             | SNP   | 1                      | NA                     | R   | NA  | [C]             | <sup>52</sup>             |
| Rv0678 | 128fs | 382 del<br>t  | indel | ≤0.015                 | ≤0.06                  | B   | S   | [B]             | CRyPTIC                   |
| Rv0678 | R134* | t             | SNP   | 0.5                    | 1.25                   | R   | R   | [C]             | <sup>22</sup>             |
| Rv0678 | L136L | cta           | SNP   | 0.12                   | NA                     | B   | NA  | [B]             | CRyPTIC                   |
| Rv0678 | M139T | NA            | SNP   | 0.25                   | NA                     | R   | NA  | [E]             | <sup>49</sup>             |
| Rv0678 | M139I | ata           | SNP   | 0.25                   | 0.25                   | R   | R   | [B]             | CRyPTIC                   |
| Rv0678 | 141fs | 421 ins<br>g  | indel | 0.25                   | NA                     | R   | NA  | [E]             | <sup>51</sup>             |
| Rv0678 | L142R | NA            | SNP   | 0.25-1.0               | NA                     | R   | NA  | [E]             | <sup>51</sup>             |
| Rv0678 | 145fs | 435 del<br>t  | indel | 0.25                   | NA                     | R   | NA  | [E]             | <sup>51</sup>             |
| Rv0678 | 146fs | 438 ins<br>t  | indel | 0.25                   | 0.5                    |     |     | [E]             | <sup>54, 29</sup>         |
| Rv0678 | M146T | acg           | SNP   | 0.25-0.8               | 1.2                    | S-R | S-R | [B]/[C]/<br>[A] | CRyPTIC,<br><sup>28</sup> |
| Rv0678 | 154fs | 461 del<br>t  | indel | 0.12                   | 0.5                    | B   | R   | [B]             | CRyPTIC                   |
| Rv0678 | 155fs | 464 ins<br>gc | indel | 0.5                    | 1                      |     |     | [B]             | CRyPTIC                   |
| Rv0678 | 155fs | 465 ins<br>c  | indel | 0.12/1-<br>2           | 0.25/2                 | B/R | R   | [B]/[C]         | CRyPTIC/<br>this<br>study |
| Rv0678 | Y157A |               | SNP   | 0.125                  | 2                      | B   | R   | [C]             | <sup>57</sup>             |
| Rv0678 | 164fs | 492 ins<br>ga | indel | 0.25                   | NA                     |     |     | [B]             | CRyPTIC                   |

193 Alt- alternative, BDQ- bedaquiline, CFZ- clofazimine, DST- drug susceptibility testing, del- deletion, fs-  
 194 frameshift, ins- insertion, MIC- minimum inhibitory concentration, NA- not available, SNP- single  
 195 nucleotide polymorphism, \*\*-stop codon

196

197 Wild-type isolates presented an MIC<sub>95</sub> of 0.12 mg/L BDQ/CFZ in the UKMYC5/6 plates<sup>58</sup>. Therefore, the  
198 patient isolates in the study were catalogued as >0.12 mg/L BDQ/CFZ resistant, <0.12 susceptible, and  
199 =0.12 borderline. The CRyPTIC dataset contained 178 patient isolates with a single *Rv0678* variant, 52 of  
200 which were classified as BDQ resistant (27 cross-resistant with CFZ), 32 with borderline BDQ resistance,  
201 and 94 BDQ susceptible (Table S4). To better explain this high number of BDQ susceptible strains with  
202 *Rv0678* mutations we looked for additional mutations in the efflux pump genes *mmpL5* and *mmpS5*, as it  
203 has been postulated that variants in these genes may reduce or abrogate acquired resistance<sup>59</sup>. However,  
204 we found that 64/94 (68%) of susceptible isolates harboring *Rv0678* mutations had WT *mmpL5/mmpS5*  
205 genes (Table S4). Likely functional/inactivating mutations in *mmpL5* (19/19 isolates with frameshifts and  
206 3/5 with missense) were associated with susceptibility while synonymous mutations appeared  
207 uncorrelated with susceptibility (7/18 isolates susceptible).

208 Plotting all 147 resistance and borderline resistance-associated *Rv0678* mutations on the gene sequence  
209 (Figure 1), reveals that they occur throughout the entire length of the gene with no single hot spot region.  
210 However, there are several regions where mutations are more likely to occur, i.e. codons 46-53 and 62-  
211 68 (Figure 3B).



A. *In vitro* selected (61) Patient derived (98)

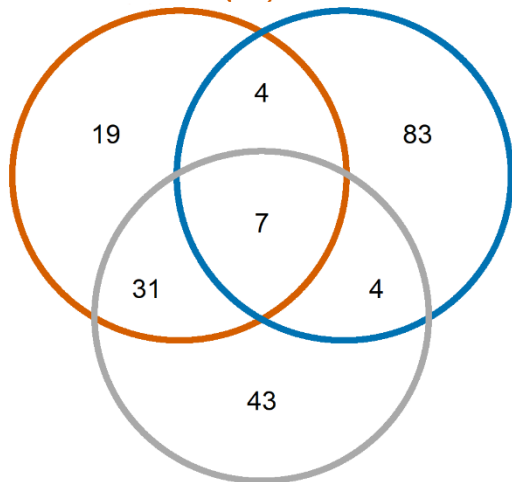

B. *In vitro* population (85)

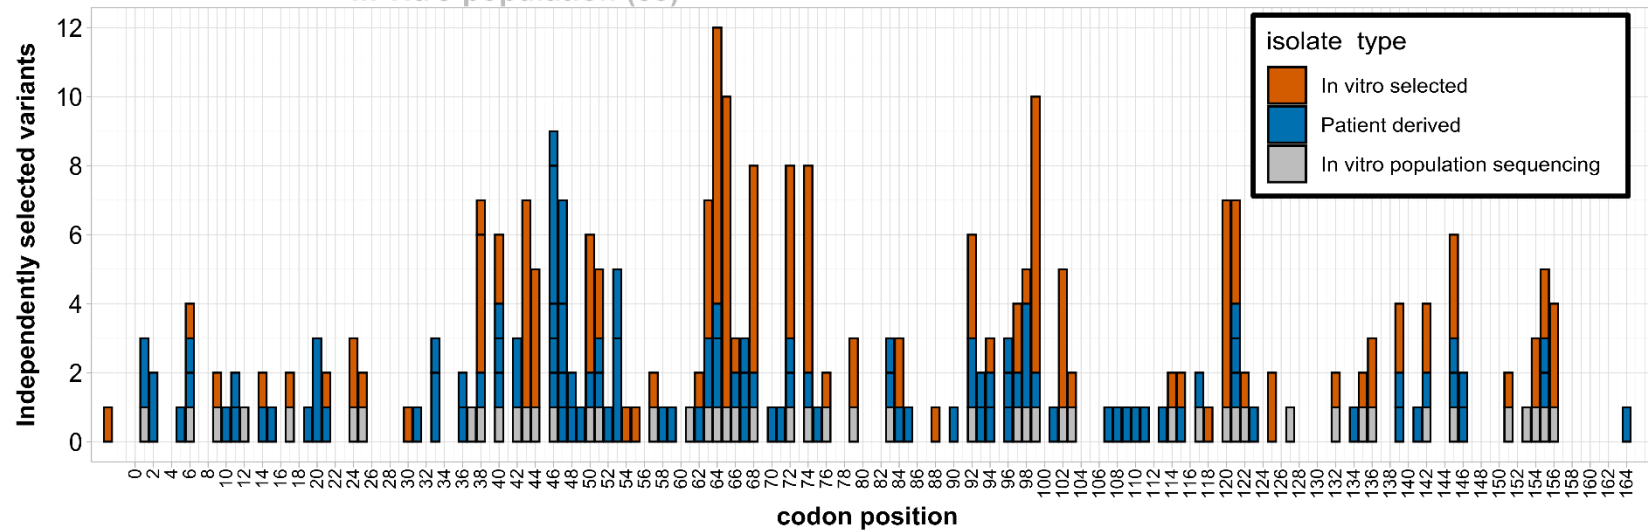

213 **Figure 3: Mutations and coding position overlap throughout *Rv0678*, *in vitro* and patient datasets.** Overlapping mutations which conferred BDQ  
214 resistance were compared between three datasets: *in vitro* selected mutants (Table 1), *in vitro* population sequencing (Table S1), and patient derived  
215 variants (Table 2). (A) Venn diagram describes number overlapping mutations in the three datasets, all mutations must have the same SNP or a  
216 deletion/insertion at same coding position to overlap. (B) Data represents number of mutants selected at given coding position for *in vitro* selected  
217 (orange) and patient derived variants (blue), indicated with gray box if detected in *in vitro* population sequencing.

218 Next, we searched the CRyPTIC dataset for resistance conferring mutations (BDQ MIC >0.12 mg/L) in *atpE*,  
219 *pepQ* (*Rv2535c*) and *Rv1979c*. After filtering out phylogenetic SNPs and strains with preexisting *Rv0678*  
220 mutations, we found 35 isolates with an MIC >0.12 mg/L for BDQ harboring *Rv1979c* mutations and only  
221 3 isolates with mutations in *atpE*<sup>60</sup>. There were no BDQ resistant isolates with *pepQ* mutations, but 19  
222 strains had borderline BDQ resistance with an MIC of 0.12 mg/L. In total, we defined four *Rv1979c*-  
223 mediated resistant mutations, and 7 possible borderline-resistance conferring mutations in *pepQ*  
224 (*Rv2535c*).

225 Finally, after an in-depth literature search including *in vitro*, *in vivo*, and patient derived strains, we  
226 compiled a comprehensive catalogue of variants in BDQ resistance associated genes (Table S5). Due to  
227 insufficient data for BDQ and CFZ critical concentration determination for many phenotypic assays, and  
228 the high overlap of MIC distributions between WT and mutant clones, resistance interpretation of  
229 mutations was based on the ascribed phenotype in each publication or by WHO critical concentration  
230 when available.

### 231 **Structural variation in Rv0678**

232 For better mechanistic understanding of how *Rv0678* mutations result in BDQ/CFZ resistance, we mapped  
233 missense mutations from our catalogue to the previously determined *Rv0678* crystal structure (107  
234 mutations mapped to resolved structure positions PDB ID 4NB5, Table S5)<sup>20</sup>. As mutations in different  
235 parts of the protein structure are likely to have different effects, we investigated four different  
236 mechanisms for conferring resistance: reducing folded protein/protein stability, impairing DNA binding,  
237 altering protein dimerization, and reducing affinity for the fatty acid ligand of *Rv0678*.

238 The numerous introductions of premature stop codons and frameshift mutations reported here and  
239 elsewhere suggest loss of functional *Rv0678* protein is a common mechanism of resistance<sup>22,41,51</sup>.  
240 Consistent with this, if we compare the missense *Rv0678* mutations in resistant isolates with those in  
241 susceptible isolates, we find the former are more commonly predicted to destabilize the *Rv0678* WHTH  
242 domain required for DNA binding (destabilization defined as  $\Delta\Delta G \leq -1$  kcal/mol as measured by mCSM  
243 protein stability, 34/38 R, 5/10 S, OR 7.96, Fisher exact  $p=0.012$ ), suggesting that disruption of protein  
244 stability is also a resistance mechanism. These findings are also compatible with the observation that  
245 missense mutations from resistant isolates are predicted to have a more deleterious effect by SNAP2  
246 score compared with those from susceptible isolates (Wilcoxon  $p=0.018$ )<sup>61</sup>.

247 To understand how mutations may impact DNA binding, we structurally aligned the wHTH DNA binding  
248 domain of Rv0678 to several other Mtbc marR-family transcriptional regulators whose DNA-bound  
249 structures have been determined (Figure 4B, S3; average RMSD 0.81 Å)<sup>62</sup>. We found that mutations  
250 clustering in regions 62-68 and 88-92 correlate with the recognition  $\alpha$ -helix and conserved DxR motif  
251 respectively, which directly contact the DNA and have previously been shown to be critical for the binding  
252 affinity of other marR-family regulators (Figure 4B)<sup>62,63</sup>. However, further experimental verification of  
253 these mutations' effects on DNA binding is required.

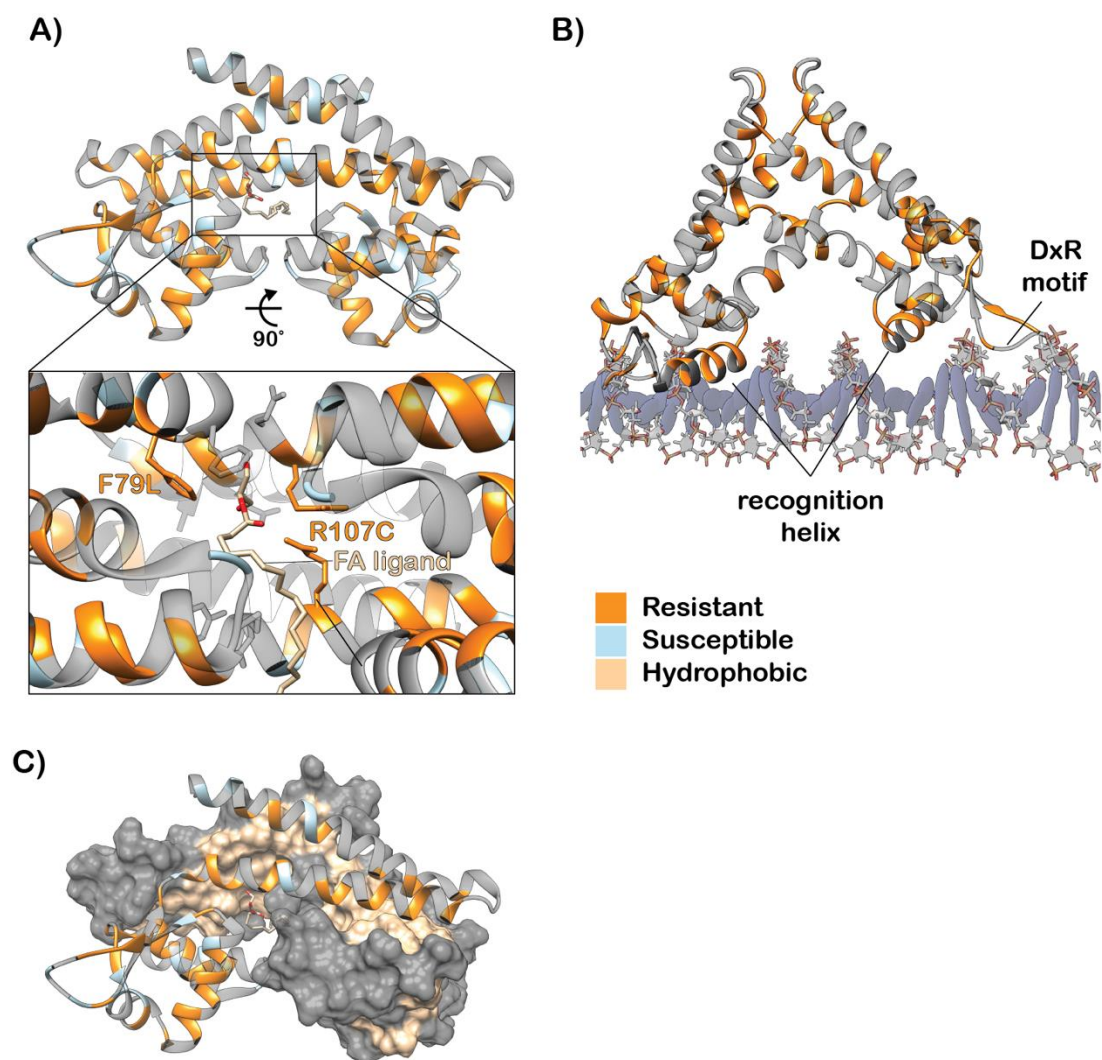

254

255 **Figure 4: Structural mechanisms of BDQ resistance.** (A) Rv0678 dimer with resistant (orange) and  
256 susceptible (blue) mutations shown. Pullout highlights the resistant mutations in the ligand binding

257 pocket. (B) Rv0678 dimer modeled onto DNA. Conserved MarR-family DNA binding elements are noted.  
258 (C) Resistant mutations occur across the hydrophobic dimerization domain.

259 We also investigated the possibility that mutations alter the protein-protein interactions of the Rv0678  
260 dimer. Mutations associated with resistance are enriched at the dimer interface (27/29 interface  
261 mutations R), suggesting they may impact dimer formation and/or stability (Figure 4C). However,  
262 computational prediction of interface mutations' effects on non-DNA bound dimer stability revealed no  
263 significant difference in destabilization as defined by mCSM PPI  $\Delta\Delta G \leq -1$  kcal/mol (16/27 R, 1/2 S).  
264 Interpretation of the DNA-bound dimer interface was not feasible due to the significant conformational  
265 rearrangement of the dimer alpha-helices upon DNA binding. Finally, all isolates where an amino acid that  
266 contacts the fatty acid ligand 2-stearoylglycerol was mutated were resistant, suggesting that disrupting  
267 the binding of the ligand confers resistance, possibly through perturbing non-DNA bound homodimer  
268 formation (Figure 4A).

### 269 **Molecular dynamics simulations**

270 Rv0678 must also undergo a conformational rearrangement to bind DNA which is not captured by the  
271 static structures in the previous section. Therefore, we employed molecular dynamics simulations to  
272 understand how particular mutations in the "hinge" region (connecting the DNA binding and dimerization  
273 domains) might disrupt this motion and lead to resistance. To do this, we performed 100ns simulations  
274 on the WT Rv0678 homodimer as well as Rv0678 homodimers containing either L40F and A101E  
275 mutations (which are associated with resistance but do not clearly interact with the DNA or disrupt protein  
276 folding) or the L40V mutation (consistently phenotypically susceptible). These simulations revealed that  
277 mutations from resistant isolates (L40F and A101E) resulted in changes in the conformational dynamics  
278 and pocket crosstalk of the individual Rv0678 monomers distinct from WT or the L40V mutation (Figure  
279 5). In particular, A101E formed a new stable salt-bridge interaction in the "hinge" domain, which could  
280 disrupt the conformational flexibility required by this region to transition between the DNA- and ligand-  
281 bound homodimer states (Figure S4).

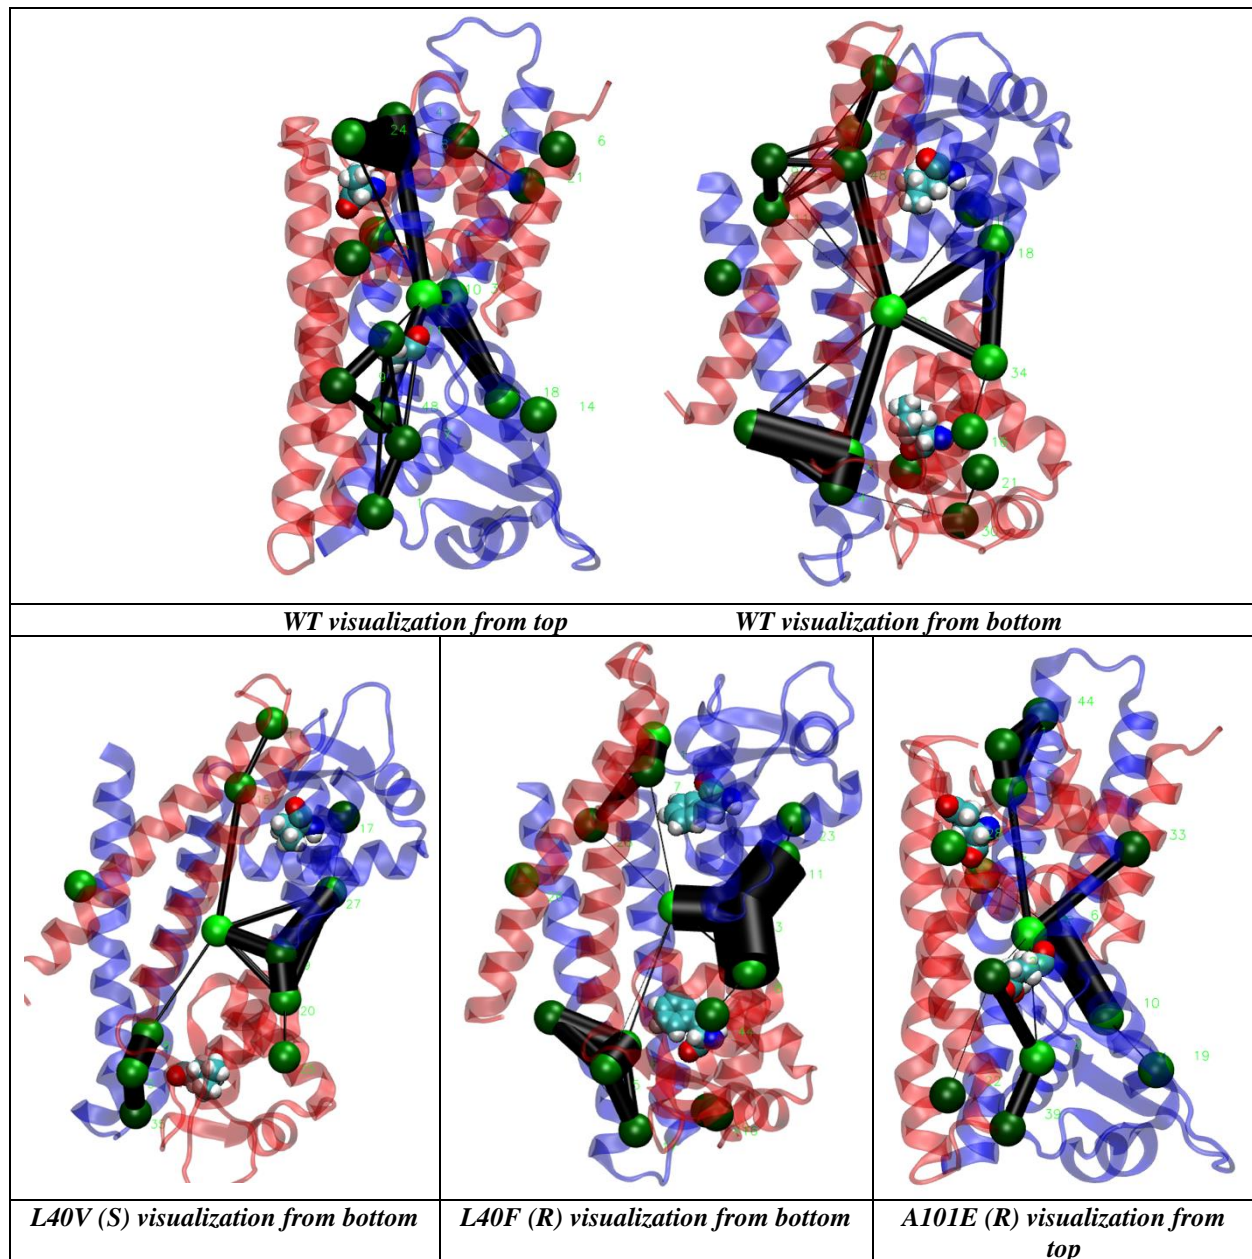

282 **Figure 5: Networks of the most persistent pockets found in the wild-type (WT) and mutated Rv0678.**  
 283 The pocket crosstalk analysis on simulated systems identifies allosteric signaling. All systems shared a  
 284 large common pocket located at the interface of the two monomers (Figure S5). This large pocket  
 285 communicates with other smaller pockets at different zones of the homodimer by the network edges  
 286 (black lines). Comparative analysis showed that the resistance-conferring mutations, L40F and A101E  
 287 displayed different network edges during the 100ns of simulations with respect to the WT. R- resistant, S-  
 288 susceptible

## 289 **Discussion**

290 In this study, we identify new bedaquiline and clofazimine resistance determinants by combining *in vitro*  
291 evolution experiments with WGS and MIC data, including the analysis of 14,151 clinical Mtb strains  
292 provided by the CRyPTIC consortium (<http://www.crypticproject.org/>). The results have allowed us to  
293 define a comprehensive set of genomic variants associated with resistance to BDQ (& CFZ), which are  
294 central to treating MDR, pre-XDR and XDR-TB<sup>8</sup>. This project also demonstrates the potential of *in vitro*  
295 evolution experiments employing selection under sub-lethal drug concentrations to generate clones with  
296 a wide spectrum of mutations, including clinically relevant mutations. Collectively, this work helps extend  
297 the use of genomics in providing personalized medicine to patients with MDR, pre-XDR, and XDR-TB,  
298 through bolstering genotypic catalogues with phenotypically verified variant lists.

299 Although BDQ/CFZ are rolled out worldwide as core drugs in treatment regimens for MDR-TB patients<sup>8</sup>,  
300 antibiotic susceptibility testing for these compounds is rarely available and patients are often treated  
301 empirically. Indeed, recent studies report treatment failure and/or poor outcome of MDR-TB patients as  
302 mutations in *Rv0678* emerge that are associated with BDQ/CFZ resistance<sup>12,15,17,26,54</sup>. Additionally,  
303 misdiagnosis can promote the selection and subsequent transmission of specific MDR Mtb strains. For  
304 example, it was recently reported in Eswatini and South Africa, that patients infected with an MDR  
305 outbreak strain harboring the RMP mutation I491F, which is not detectable by conventional phenotypic  
306 or genotypic testing, probably continued to receive RMP although it was ineffective<sup>30</sup>. These strains now  
307 represent more than 60% of MDR strains in Eswatini and additionally more than half of these developed  
308 enhanced BDQ/CFZ MICs via acquired *Rv0678* mutations<sup>1,29,30,64</sup>. This scenario underlines the urgent need  
309 for approaches to rapidly detect resistance, including to BDQ/CFZ, with baseline diagnostics and during  
310 therapy (e.g. via WGS or targeted genome sequencing) to avoid treatment failure, further resistance  
311 development and ongoing transmission of specific MDR strains.

312 Genome sequencing techniques have been demonstrated to accurately identify genomic variants in all  
313 target regions involved in resistance development in a single analysis<sup>3,65</sup>. However, several major  
314 challenges exist—including linking genotype and phenotype to distinguish resistance-mediating from  
315 benign mutations and interpreting how multiple mutations interact when the resistance phenotype is  
316 polygenic, as is the case with BDQ and CFZ<sup>60</sup>. This work catalogues the phenotype of 260 unique genomic  
317 variants across six genes. Importantly, not all variation leads to resistance, as 38 of these mutations in

318 *Rv0678* are not associated with resistance to BDQ/CFZ (Table S5), which facilitates the prediction of  
319 BDQ/CFZ susceptibility. Furthermore, 30/94 BDQ susceptible isolates with *Rv0678* mutations harbored an  
320 additional mutation in the *mmpL5* or *mmpS5* efflux pump genes, which may abrogate the efflux pump  
321 mechanism and reconstitute the susceptible phenotype<sup>59</sup>. Here, we provide preliminary evidence that  
322 isolates with inactivating (frameshift, nonsense, or missense variants) *mmpL5* mutations can override  
323 *Rv0678* resistance-mediating mutations, resulting in hyper-susceptibility to BDQ. Further work to  
324 understand the frequency, distribution and origin of these inactivating mutations is necessary to  
325 understand their clinical relevance worldwide.

326 While genome sequencing of clinical Mtb strains has been deployed in several countries, its  
327 implementation is constrained not just by technical and data analysis considerations, but also because  
328 working directly from clinical samples (e.g. sputum) is difficult<sup>3</sup>. We recently demonstrated that targeted  
329 genome sequencing using the commercially available Deeplex<sup>®</sup>-MycTB has a high sensitivity and  
330 specificity for first- and second-line drug resistance prediction, including BDQ/CFZ resistance mutations  
331 that have been found in patients<sup>64,66,67</sup>. In combination with our comprehensive set of mutations that  
332 confer resistance to BDQ/CFZ, Deeplex<sup>®</sup>-MycTB and other targeted sequencing approaches allow for rapid  
333 detection of BDQ/CFZ resistance from clinical samples in few days using small portable genome  
334 sequencers such as the MinION<sup>68</sup>.

335 Importantly, *in vitro* laboratory evolution experiments identified 50 resistance-conferring mutations that  
336 have not yet appeared in clinical strains, thus allowing us to characterize and identify a significant  
337 proportion of resistance-conferring mutations before they have even occurred in a patient. These results  
338 highlight the value of *in vitro* evolution experiments as a complementary method for prospective  
339 identification of resistance, as compared to traditional surveillance of patient isolates. Furthermore, this  
340 method provides a large strain collection of *de novo* resistant clones from a comparable wild-type  
341 susceptible ancestor. Finally, by using PacBio sequencing to establish the full genome sequence of mutant  
342 clones without any mutations in the relevant targets, we were able to identify a large genomic inversion  
343 that disrupts *Rv0678*, which should be considered as a novel BDQ/CFZ resistance mechanism.

344 Another method for prospectively identifying mutations that confer resistance is structure-based  
345 modeling, which has recently been combined with machine learning methods to design algorithms for  
346 predicting resistance to rifampicin, isoniazid, and pyrazinamide<sup>69–73</sup>. These approaches rely on the fact



347 that resistance-conferring mutations are often located in drug binding pockets or active sites and have  
348 distinct biophysical consequences as compared to their susceptible counterparts <sup>74</sup>. This study identifies  
349 several resistance mechanisms in *Rv0678* with quantifiable structural effects (protein stability, dimer  
350 interactions, SNAP2 scores, and interaction with the DNA), suggesting that a structure-based machine  
351 learning approach could also be successful for predicting BDQ/CFZ resistance.

352 As we have shown, any approach to predict BDQ resistance must consider not only mutations present in  
353 *Rv0678*, but also potential resistance/susceptibility determinants in other putative resistance-conferring  
354 genes e.g. *atpE*, *pepQ*, *Rv1979c*, and *mmpL/S5*. It has been attempted to predict BDQ resistance from *atpE*  
355 mutations <sup>75</sup>, so one feasible option would be a meta-approach that flags if any individual gene-level  
356 algorithms predict resistance/susceptibility. In addition, CRyPTIC and other studies are producing large  
357 MIC datasets, which will enable much more nuanced modeling of resistance, which is particularly  
358 important for drugs with efflux-mediated resistance that often exhibit small sub-threshold changes in MIC.  
359 Although structure-based modeling is helpful in predicting resistance, these structural hypotheses must  
360 be confirmed experimentally for final validation.

361 As indicated by the overlap of *in vitro* selected mutations with 11 resistance conferring mutations found  
362 in patients, sub-MIC drug concentration can select for clinically relevant resistance variants. This modeling  
363 might also better imitate the intra-patient situation, since the complex pathology of TB disease prevents  
364 certain drugs (i.e. bactericidal and bacteriostatic drugs), from reaching all bacteria at a therapeutic level  
365 (for example structures like pulmonary cavities and granuloma lesions) <sup>33,35,36,77</sup>. BDQ and CFZ in particular  
366 do not penetrate the central caseous lesion (or necrotic center) of the granuloma effectively <sup>34</sup>. Although  
367 this study provides a large collection of *in vitro* selected *Rv0678*-mediated resistant clones, the efflux  
368 pump modulation by these various mutations was not experimentally investigated and should be explored  
369 in the future.

370 In addition to clear-cut resistance-associated mutations, additional “secondary” mutations were co-  
371 selected with resistance-associated variants *in vitro*. These secondary mutations affected several genes,  
372 mainly associated with cellular processes such as cell wall synthesis, metabolic processes, and protein  
373 regulation; with mutations also in genes of unknown function (Table S3). It is possible that these mutations  
374 bring about an additional phenotypic affect, or they may be compensatory mutations <sup>5,78</sup>. However, until

375 further experiments are conducted, such as competitive fitness assays (or even transcriptomic analysis),  
376 it cannot be ruled out that these are merely hitchhiking mutations or culture-selected variants.

377 In this study, we focused on structural mechanisms of *Rv0678* mediated resistance, as these mutations  
378 are the most clinically relevant and correlated with BDQ treatment failures. Other genes which have been  
379 linked to BDQ or CFZ resistance, such as *atpE*, *pepQ* and *Rv1979c*, but their clinical relevance has yet to  
380 be established<sup>10,29,49,53</sup>. In the CRyPTIC dataset we identified four *Rv1979c* variants which presented a  
381 resistant phenotype to BDQ with variable CFZ cross resistance, and seven mutations in *pepQ* garnering  
382 borderline BDQ resistance and variable CFZ resistance. Finally, mutations in *atpE* (coding for the target of  
383 BDQ) were rare among the *in vitro* selection experiments and the CRyPTIC dataset, suggesting that *atpE*  
384 mutations might have a high fitness cost.

385 In conclusion, our work advances our understanding of how resistance can arise to BDQ and CFZ. This  
386 information provides an updated variant catalogue, comprising of mutations and structural variations  
387 associated with BDQ/CFZ resistance as well as benign variants and mutations implicated with hyper-  
388 susceptibility. Employing this information in DNA sequencing-based diagnostic approaches will allow for  
389 the first time a rational design of BDQ and CFZ -containing MDR-TB therapies.

## 390 **Materials and Methods**

### 391 ***In vitro* evolution experiments**

392 *In vitro* experiments were carried out with H37Rv strain (ATCC 27294). Bedaquiline was purchased from  
393 Janssen-Cilag GmbH and clofazimine was ordered from Sigma (C8895-1G) both were reconstituted from  
394 powder in DMSO and stored at -20°C.

395 Evolutionary experiments were conducted with the *Mycobacterium tuberculosis* complex (Mtb) lab strain  
396 H37Rv. The bacteria were cultured from frozen stocks and (pre)cultured at 37° in 7H9 medium,  
397 supplemented with 0.2% glycerol, 10% oleic albumin dextrose catalase (OADC), and 0.05% Tween<sup>80</sup>  
398 (termed culture medium). At exponential growth phase (between 0.3 and 0.6 optical density (OD) of  
399 600nm), bacteria were transferred to new culture medium with a final OD of 0.05 in 50 mL, additionally  
400 supplemented with either bedaquiline (BDQ) or clofazimine (CFZ). Four concentrations below the  
401 minimum inhibitory concentration (MIC) were included for each drug at 1:2, 1:4, 1:8, and 1:16 below the

402 strain MIC (and an antibiotic-free control). The MIC of the susceptible WT ancestor was determined to be  
403 0.12 mg/L BDQ and 0.5 mg/L CFZ in this culturing system.

404 These experiments were carried out over 20 days with five culture passages total. Culture passages were  
405 conducted every four days with a final culture OD of 0.05 transferred. After passages 1, 3, and 5; bacteria  
406 were plated on selective agar plates of 7H11, supplemented with 0.5% glycerol, 10% OADC and either  
407 0.12 (1:2 MIC) or 0.25 (MIC) mg/L of BDQ, or 0.25 (1:2 MIC) mg/L CFZ. After 21-28 days of growth on  
408 selective agar plates, single colonies were transferred to culture medium, grown for 2-4 weeks, then two  
409 1 mL aliquots were frozen at -80, and samples were taken for whole genome sequencing (WGS). All  
410 remaining colonies (collected by experimental condition) were collected for WGS, i.e. total population  
411 sequencing.

#### 412 **Whole genome sequencing**

413 Isolates from *in vitro* evolutionary experiments underwent DNA isolation by CTAB method <sup>79</sup>. Paired-end  
414 DNA library preparations and sequencing was performed with Illumina technology (Nextera-XT and  
415 NextSeq500) according to the manufacturer's instructions and with a minimum average genome coverage  
416 of 50x. Fastq files (raw sequencing data) were mapped to the *M. tuberculosis* H37Rv reference genome  
417 (GenBank ID: NC\_000962.3) using the MTBseq pipeline <sup>80</sup>.

418 Briefly, for the analysis of single mutants we considered single nucleotide polymorphisms (SNPs) which  
419 were covered by a minimum of four reads in both forward and reverse orientation, four reads calling the  
420 allele with at least a phred score of 20, and an allele frequency of 75%. For the detection of insertions and  
421 deletion (InDels) we allowed a frequency over 50%.

422 Deep sequencing was conducted for population diversity analysis with an average genome wide coverage  
423 of 200 – 420; SNPs and InDels were called with at least one forward and one reverse read and a phred  
424 score >20 for at least 2 reads.

425 Three isolates underwent sequencing using the PacBio Sequel II System (Pacific Biosciences). Libraries  
426 were prepared with the SMRTbell® Express Template Prep Kit 2.0 according to the manufacturer's  
427 instructions. Barcoded overhang adapters for multiplexing were ordered at IDT (Integrated DNA  
428 Technologies). During demultiplexing barcodes were filtered for a minimum quality of 50t, which yielded

429 long read sequencing data of an average of 4.4 GB and mean subread length of 9 KB. Long read sequences  
430 were *de novo* assembled using PacBio SMRT® Link software version 9 and the “Microbial Assembly”  
431 workflow with a set genome size of 4.5 GB with default parameters.

#### 432 **Screening of Rv0678 mutations in clinical samples via the CRyPTIC strain collection**

433 Patient derived Mtb isolates were collected by CRyPTIC partners throughout 27 countries and analyzed  
434 in 14 different laboratories. Strains were selected from the CRyPTIC database for this study if they had  
435 matched genotype and phenotype data, a high quality BDQ phenotype, and a mutation in BDQ resistance  
436 associated gene (either *atpE*, *Rv1979c*, *pepQ*, *mmpL/S5*, or *Rv0678*). This led to the curation of 179 strains  
437 in total.

438 The full analysis pipeline for CRyPTIC is documented in [paper in preparation], but we outline the key steps  
439 here. Sequencing reads were deposited at the European Bioinformatics Institute and run through a  
440 bespoke bioinformatics pipeline (publicly available here: <https://github.com/iqbal-lab-org/clockwork>). In  
441 short, reads were filtered against human and other microbial species reads before being mapped to the  
442 H37Rv reference genome. Two parallel variant callers (SamTools and Cortex) were used<sup>81,82</sup>, one of which  
443 makes high sensitivity SNP calls (SamTools) and one which makes high specificity SNP and indel calls  
444 (Cortex). A graph-based adjudication tool (Minos, <https://github.com/iqbal-lab-org/minos>) was then used  
445 to combine these results and create a final set of variants for downstream bioinformatics analysis. All  
446 strains were re-genotyped at positions that were variant in at least one CRyPTIC sample, creating a final  
447 variant call file with a call for each variant position in the *M. tuberculosis* H37Rv genome.

#### 448 **Phenotyping**

449 *In vitro* single selected mutants were further analyzed for phenotypic drug susceptibility to both BDQ and  
450 CFZ by broth microtiter dilution as a resazurin assay. All mutants were grown in antibiotic free culture  
451 media to exponential growth phase (optical density of 0.3-0.8), then diluted to the McFarland standard of  
452 1, with an additional 1:10 dilution, 100 µl of which was seeded in 96-well flat bottom plates (about 1x10<sup>5</sup>  
453 CFU per well). Next 100 µL of antibiotic was added to each well with final concentrations of BDQ as follows:  
454 8, 4, 2, 1, 0.5, 0.25, 0.12, and 0 mg/L; and CFZ: 16, 8, 4, 2, 1, 0.5, 0.25, 0.12, and 0 mg/L. Plates were sealed  
455 with permeable tape, and incubated at 37° standing, in sealed plastic boxes. After nine days incubation at  
456 37°, 30µl of resazurin was added to each well. After overnight incubation, fluorescence and absorbance

457 were measure in Biotek plate reader Synergy 2. MIC was determined as the highest concentration which  
458 no bacterial growth was detected, either visually or by fluorescence measurement.

459 For MGIT susceptibility testing, 100µl of frozen bacterial stocks were transferred to Löwenstein-Jensen  
460 agar slants and incubated at 37° for three weeks. BACTEC™ MGIT™ 960 SIRE Kit was used and test was  
461 carried out according to manufacture instructions. Saline 0.83% solution was used for adjusting bacterial  
462 suspension concentration instead of Middlebrook 7H9 broth. Drug concentrations tested were 0.5, 1.0,  
463 and 2.0 mg/L for BDQ; 0.5, 1.0, and 2.0 mg/L for CFZ; 0.03, 0.06, and 0.12 mg/L for delamanid; and 0.5,  
464 1.0, and 2.0 mg/L for linezolid. All MGIT tubes which were positive (growth units reached 400) before the  
465 antibiotic free growth control were considered resistant. An H37Rv WT strain was not included in this  
466 test. CRYPTIC strains were phenotyped using either the UKMYC5 plate or the updated UKMYC6 plate<sup>83</sup>.  
467 Plates were sealed, incubated at 37°C, and read at 14 days. In addition to manual plate readings, all plate  
468 images underwent an automated reading using AMyGDA software<sup>46</sup>. Plates without essential agreement  
469 for a drug MIC were marked as low quality and sent to a citizen science project (BashTheBug,  
470 <http://bashthebug.net>) for additional verification. Plates with exact agreement between at least two  
471 phenotyping methods were marked as high quality. Low (no method agrees) and medium (two methods  
472 with essential agreement) quality phenotypes were excluded from this analysis.

473 All strains included in this study had at least phenotypic data for BDQ. Some strains do not include CFZ  
474 data due to missing information, low quality analysis, or removal due to experimental error.

#### 475 ***Rv0678* variant literature search**

476 An extensive search was performed to include and summarize previously published BDQ and/or CFZ  
477 resistant associated mutations from *in vitro*, *in vivo*, and patient derived isolates. We used PubMed,  
478 Google, and Google Scholar to search literature published from 2014 to June 2021. Search criteria included  
479 the key “TB”, “Mycobacterium tuberculosis”, “MTB”, “bedaquiline”, “clofazimine”, “treatment”, “clinical  
480 report”, “patient”, “MDR-TB”, “XDR-TB”, “diarylquinoline”, and “drug resistance”.

481 Mutations in all resistance associated genes: *Rv0678*, *atpE*, *Rv1979c*, and *pepQ* were included in our final  
482 analysis, all variants with low MICs or multiple mutations in the same gene were excluded (Table 2, Table  
483 S5).

#### 484 **Structural modelling**

485 The crystal structure of Rv0678 (PDB ID: 4NB5) was visualized using UCSF Chimera<sup>84</sup>. Structural alignment  
486 of the wHTH domain was performed using the MatchMaker tool in Chimera with a Needleman-Wunsch  
487 algorithm using a BLOSUM-62 matrix and was iteratively pruned until no long atom-pair was  $> 2 \text{ \AA}$  resulting  
488 in a final average RMSD of  $0.81 \text{ \AA}$  over the 5 guide structures (PDB IDs: 5HSO, 5HSM, 4FX0, 4FX4, 4YIF). All  
489 protein stability, protein-protein and protein-DNA interactions were modeled using established mCSM  
490 methods with either ligand-bound or DNA-bound Rv0678<sup>85,86</sup>. Mutations that presented both resistant  
491 and susceptible phenotypes were treated as resistant during statistical calculations. Screening our  
492 resistance catalogue for missense mutations that were resolved in the structure with phenotypes yielded  
493 107 unique missense mutations. mCSM tools are available at <http://biosig.unimelb.edu.au/biosig>.

#### 494 **Molecular dynamics simulations**

495 All the systems simulated in the present work, including Rv0678-WT, Rv0678-A101E, Rv0678-L40V and  
496 Rv0678-L40F, were prepared using BiKi Life Sciences Software Suite version 1.3.5 of BiKi Technologies s.r.l  
497<sup>87</sup>. Each simulated system consisted of Rv0678 homodimer unit X-ray structure (PDB ID 4NB5) and the  
498 mutations were generated using UCSF Chimera software<sup>84</sup>. The Amber14 force field was used in all  
499 molecular dynamic simulations. TIP3P waters were added to make an orthorhombic box. Adding a suitable  
500 number of counter-ions neutralized the overall system. Then, the energy of the whole system was  
501 minimized. Four consecutive equilibration steps were then performed: 1) 100 ps in the NVT ensemble at  
502 100K with the protein backbone restrained ( $k=1000 \text{ kJ/mol nm}^2$ ), 2) 100 ps in the NVT ensemble at 200K  
503 with the protein backbone similarly restrained, 3) 100 ps in the NVT ensemble at 300K with the protein  
504 backbone restrained, and 4) 1000 ps in NPT ensemble at 300K with no restraints. For atoms less than  
505 1.1nm apart, electrostatic forces were calculated directly; for atoms further apart electrostatics were  
506 calculated using the Particle Mesh Ewald. Van der Waals forces were only calculated for atoms within 1.1  
507 nm of one another. The temperature was held constant using the velocity rescale thermostat, which is a  
508 modification of the Berendsen's coupling algorithm. Finally, simulations 100 ns long in the NPT ensemble  
509 at 300K were performed for each system. To detect allosteric signal transmission networks across the  
510 protein surface, defined as interconnected pocket motions, we carried out the allosteric communication  
511 network analysis using the Pocketron module in BiKi Life Sciences Suite version 1.3.5<sup>87</sup>.

512 **CRyPTIC Ethics statements as at 22 Feb 2021.** Approval for CRyPTIC study was obtained by Taiwan Centers  
513 for Disease Control IRB No. 106209, University of KwaZulu Natal Biomedical Research Ethics Committee  
514 (UKZN BREC) (reference BE022/13) and University of Liverpool Central University Research Ethics  
515 Committees (reference 2286), Institutional Research Ethics Committee (IREC) of The Foundation for  
516 Medical Research, Mumbai (Ref nos. FMR/IEC/TB/01a/2015 and FMR/IEC/TB/01b/2015), Institutional  
517 Review Board of P.D. Hinduja Hospital and Medical Research Centre, Mumbai (Ref no. 915-15-CR [MRC]),  
518 scientific committee of the Adolfo Lutz Institute (CTC-IAL 47-J / 2017) and in the Ethics Committee  
519 (CAAE: 81452517.1.0000.0059) and Ethics Committee review by Universidad Peruana Cayetano  
520 Heredia (Lima, Peru) and LSHTM (London, UK).

521 **Authors' contributions.** LS, JC, AS, ZI, MH, KM, CU, DS, CR, KN, PF, MM and SN conceived the idea,  
522 designed the study, and analyzed and interpreted the data. All authors contributed to obtaining and  
523 assembling the data. LS, JC, AS, ZI, MM, PF and SN wrote the initial draft of the paper. All authors  
524 contributed to data interpretation, final drafting of the paper and approved the final version of the  
525 manuscript.

526 **Competing interest.** Authors declare no competing interests.

527 **Acknowledgments.** We thank Dr. Musco Giovanna and Dr. Ballabio Federico (San Raffale Hospital) for  
528 their help in the molecular dynamics set up. We would like to acknowledge the technical support at  
529 Research Center Borstel, especially Vanessa Mohr, Tanja Niemann, Carina Hahn, Silvia Mass, and Doreen  
530 Beyer for their aid in the laboratory.

531 **Funding.** All *in vitro* experimental work was financially supported though EvoLUNG: Evolutionary Medicine  
532 of the Lung, a Leibniz science campus for evolutionary medicine research ([http://evolung.fz-  
533 borstel.de/](http://evolung.fz-borstel.de/)). JC is funded by the Rhodes Trust and the Stanford University Medical Scientist Training  
534 program. PWF is funded by the NIHR Oxford Biomedical Research Centre, Oxford University Hospitals NHS  
535 Foundation Trust, John Radcliffe Hospital, Oxford, UK. The views expressed are those of the author(s) and  
536 not necessarily those of the NHS, the NIHR or the Department of Health. The work of the CRyPTIC  
537 consortium was supported by the Bill & Melinda Gates Foundation [OPP1133541] and the Wellcome Trust  
538 [200205/Z/15/Z].

539 **References**

- 540 1. WHO | *Global tuberculosis report 2019*. [http://www.who.int/tb/publications/global\\_report/en/](http://www.who.int/tb/publications/global_report/en/)  
541 (2019).
- 542 2. Dheda, K. *et al.* The Lancet Respiratory Medicine Commission: 2019 update: epidemiology,  
543 pathogenesis, transmission, diagnosis, and management of multidrug-resistant and incurable  
544 tuberculosis. *The Lancet Respiratory Medicine* **7**, 820–826 (2019).
- 545 3. Dheda, K. *et al.* The epidemiology, pathogenesis, transmission, diagnosis, and management of  
546 multidrug-resistant, extensively drug-resistant, and incurable tuberculosis. *The Lancet Respiratory*  
547 *Medicine* **5**, 291–360 (2017).
- 548 4. Kendall, E. A., Fofana, M. O. & Dowdy, D. W. Burden of transmitted multidrug resistance in epidemics  
549 of tuberculosis: a transmission modelling analysis. *The Lancet Respiratory Medicine* **3**, 963–972  
550 (2015).
- 551 5. Merker, M. *et al.* Compensatory evolution drives multidrug-resistant tuberculosis in Central Asia. *eLife*  
552 **7**, e38200 (2018).
- 553 6. Shah, N. S. *et al.* Transmission of Extensively Drug-Resistant Tuberculosis in South Africa. *New England*  
554 *Journal of Medicine* **376**, 243–253 (2017).
- 555 7. WHO Consolidated Guidelines on Tuberculosis, Module 4: Treatment - Drug-Resistant Tuberculosis  
556 Treatment. <https://www.who.int/publications-detail-redirect/9789240007048>.
- 557 8. WHO | Rapid Communication: Key changes to the treatment of drug-resistant tuberculosis. WHO  
558 [http://www.who.int/tb/publications/2019/rapid\\_communications\\_MDR/en/](http://www.who.int/tb/publications/2019/rapid_communications_MDR/en/).



- 559 9. Huitric, E. *et al.* Rates and mechanisms of resistance development in *Mycobacterium tuberculosis* to  
560 a novel diarylquinoline ATP synthase inhibitor. *Antimicrobial Agents and Chemotherapy* (2010)  
561 doi:10.1128/AAC.01611-09.
- 562 10. Almeida, D. *et al.* Mutations in *pepQ* confer low-level resistance to bedaquiline and clofazimine in  
563 *Mycobacterium tuberculosis*. *Antimicrobial Agents and Chemotherapy* (2016)  
564 doi:10.1128/AAC.00753-16.
- 565 11. Zhang, S. *et al.* Identification of novel mutations associated with clofazimine resistance in  
566 *Mycobacterium tuberculosis*. *Journal of Antimicrobial Chemotherapy* (2015) doi:10.1093/jac/dkv150.
- 567 12. de Vos, M., Ley, S. D. & Cox, H. Bedaquiline micro-heteroresistance after tuberculosis treatment  
568 cessation. *N Engl J Med* **380**, 2178–2180 (2019).
- 569 13. Ismail, N. A. *et al.* Defining Bedaquiline Susceptibility, Resistance, Cross-Resistance and Associated  
570 Genetic Determinants: A Retrospective Cohort Study. *EBioMedicine* (2018)  
571 doi:10.1016/j.ebiom.2018.01.005.
- 572 14. Villellas, C. *et al.* Unexpected high prevalence of resistance-associated Rv0678 variants in MDR-TB  
573 patients without documented prior use of clofazimine or bedaquiline. *The Journal of antimicrobial*  
574 *chemotherapy* (2017) doi:10.1093/jac/dkw502.
- 575 15. Kranzer, K. *et al.* New World Health Organization treatment recommendations for multidrug-resistant  
576 tuberculosis: Are we well enough prepared? *American Journal of Respiratory and Critical Care*  
577 *Medicine* (2019) doi:10.1164/rccm.201902-0260LE.

- 578 16. Polsfuss, S. *et al.* Emergence of Low-level Delamanid and Bedaquiline Resistance During Extremely  
579 Drug-resistant Tuberculosis Treatment. *Clinical Infectious Diseases* **69**, 1229–1231 (2019).
- 580 17. Andres, S. *et al.* Bedaquiline-Resistant Tuberculosis: Dark Clouds on the Horizon. *Am J Respir Crit Care*  
581 *Med* **201**, 1564–1568 (2020).
- 582 18. Islam, M. M. *et al.* Drug resistance mechanisms and novel drug targets for tuberculosis therapy.  
583 *Journal of Genetics and Genomics* **44**, 21–37 (2017).
- 584 19. Milano, A. *et al.* Azole resistance in Mycobacterium tuberculosis is mediated by the MmpS5–MmpL5  
585 efflux system. *Tuberculosis* **89**, 84–90 (2009).
- 586 20. Radhakrishnan, A. *et al.* Crystal Structure of the Transcriptional Regulator Rv0678 of Mycobacterium  
587 tuberculosis\*. *Journal of Biological Chemistry* **289**, 16526–16540 (2014).
- 588 21. Gao, Y.-R. *et al.* Structural analysis of the regulatory mechanism of MarR protein Rv2887 in M.  
589 tuberculosis. *Sci Rep* **7**, 6471 (2017).
- 590 22. Hartkoorn, R. C., Uplekar, S. & Cole, S. T. Cross-Resistance between Clofazimine and Bedaquiline  
591 through Upregulation of MmpL5 in Mycobacterium tuberculosis. *Antimicrobial Agents and*  
592 *Chemotherapy* **58**, 2979–2981 (2014).
- 593 23. Andries, K. *et al.* Acquired Resistance of Mycobacterium tuberculosis to Bedaquiline. *PLoS ONE* **9**,  
594 e102135 (2014).
- 595 24. Bloemberg, G. V. *et al.* Acquired Resistance to Bedaquiline and Delamanid in Therapy for Tuberculosis.  
596 *N Engl J Med* **373**, 1986–1988 (2015).

- 597 25. Hoffmann, H. *et al.* Delamanid and Bedaquiline Resistance in Mycobacterium tuberculosis Ancestral  
598 Beijing Genotype Causing Extensively Drug-Resistant Tuberculosis in a Tibetan Refugee. *Am J Respir*  
599 *Crit Care Med* **193**, 337–340 (2016).
- 600 26. Liu, Y. *et al.* Reduced Susceptibility of Mycobacterium tuberculosis to Bedaquiline During  
601 Antituberculosis Treatment and Its Correlation With Clinical Outcomes in China. *Clinical Infectious*  
602 *Diseases* (2020) doi:10.1093/cid/ciaa1002.
- 603 27. Nimmo, C. *et al.* Dynamics of within-host Mycobacterium tuberculosis diversity and heteroresistance  
604 during treatment. *EBioMedicine* **55**, (2020).
- 605 28. Xu, J. *et al.* Primary Clofazimine and Bedaquiline Resistance among Isolates from Patients with  
606 Multidrug-Resistant Tuberculosis. *Antimicrob Agents Chemother* **61**, e00239-17, e00239-17 (2017).
- 607 29. Nimmo, C. *et al.* Population-level emergence of bedaquiline and clofazimine resistance-associated  
608 variants among patients with drug-resistant tuberculosis in southern Africa: a phenotypic and  
609 phylogenetic analysis. *The Lancet Microbe* **1**, e165–e174 (2020).
- 610 30. Beckert, P. *et al.* MDR M. tuberculosis outbreak clone in Eswatini missed by Xpert has elevated  
611 bedaquiline resistance dated to the pre-treatment era. *Genome Medicine* **12**, 104 (2020).
- 612 31. Liu, A. *et al.* Selective Advantage of Resistant Strains at Trace Levels of Antibiotics: a Simple and  
613 Ultrasensitive Color Test for Detection of Antibiotics and Genotoxic Agents. *Antimicrobial Agents and*  
614 *Chemotherapy* **55**, 1204–1210 (2011).
- 615 32. Gullberg, E. *et al.* Selection of Resistant Bacteria at Very Low Antibiotic Concentrations. *PLoS*  
616 *Pathogens* **7**, e1002158 (2011).

- 617 33. Dartois, V. The path of anti-tuberculosis drugs: from blood to lesions to mycobacterial cells. *Nat Rev*  
618 *Micro* **12**, 159–167 (2014).
- 619 34. Sarathy, J. P. *et al.* Prediction of Drug Penetration in Tuberculosis Lesions. *ACS Infect Dis* **2**, 552–563  
620 (2016).
- 621 35. Prideaux, B. *et al.* The association between sterilizing activity and drug distribution into tuberculosis  
622 lesions. *Nature Medicine* (2015) doi:10.1038/nm.3937.
- 623 36. Dheda, K. *et al.* Drug-penetration gradients associated with acquired drug resistance in patients with  
624 tuberculosis. *American Journal of Respiratory and Critical Care Medicine* (2018)  
625 doi:10.1164/rccm.201711-2333OC.
- 626 37. Cicchese, J. M., Dartois, V., Kirschner, D. E. & Linderman, J. J. Both Pharmacokinetic Variability and  
627 Granuloma Heterogeneity Impact the Ability of the First-Line Antibiotics to Sterilize Tuberculosis  
628 Granulomas. *Front. Pharmacol.* **11**, (2020).
- 629 38. Strydom, N. *et al.* Tuberculosis drugs' distribution and emergence of resistance in patient's lung  
630 lesions: A mechanistic model and tool for regimen and dose optimization. *PLOS Medicine* **16**,  
631 e1002773 (2019).
- 632 39. Greenwood, D. J. *et al.* Subcellular antibiotic visualization reveals a dynamic drug reservoir in infected  
633 macrophages. *Science* **364**, 1279–1282 (2019).
- 634 40. Fearn, A., Greenwood, D. J., Rodgers, A., Jiang, H. & Gutierrez, M. G. Correlative light electron ion  
635 microscopy reveals in vivo localisation of bedaquiline in Mycobacterium tuberculosis–infected lungs.  
636 *PLOS Biology* **18**, e3000879 (2020).

- 637 41. Kadura, S. *et al.* Systematic review of mutations associated with resistance to the new and repurposed  
638 Mycobacterium tuberculosis drugs bedaquiline, clofazimine, linezolid, delamanid and pretomanid.  
639 *Journal of Antimicrobial Chemotherapy* **75**, 2031–2043 (2020).
- 640 42. Song, H., Sandie, R., Wang, Y., Andrade-Navarro, M. A. & Niederweis, M. Identification of outer  
641 membrane proteins of Mycobacterium tuberculosis. *Tuberculosis* **88**, 526–544 (2008).
- 642 43. Gu, S. *et al.* Comprehensive Proteomic Profiling of the Membrane Constituents of a Mycobacterium  
643 tuberculosis Strain\*S. *Molecular & Cellular Proteomics* **2**, 1284–1296 (2003).
- 644 44. Hunt, M. *et al.* ARIBA: rapid antimicrobial resistance genotyping directly from sequencing reads.  
645 *Microbial Genomics*, **3**, e000131 (2017).
- 646 45. WHO | Technical report on critical concentrations for TB drug susceptibility testing of medicines used  
647 in the treatment of drug-resistant TB. *WHO*  
648 [http://www.who.int/tb/publications/2018/WHO\\_technical\\_report\\_concentrations\\_TB\\_drug\\_susce](http://www.who.int/tb/publications/2018/WHO_technical_report_concentrations_TB_drug_susceptibility/en/)  
649 [ptibility/en/](http://www.who.int/tb/publications/2018/WHO_technical_report_concentrations_TB_drug_susceptibility/en/).
- 650 46. Fowler, P. W. *et al.* Automated detection of bacterial growth on 96-well plates for high-throughput  
651 drug susceptibility testing of mycobacterium tuberculosis. *Microbiology (United Kingdom)* (2018)  
652 doi:10.1099/mic.0.000733.
- 653 47. Kaniga, K. *et al.* A Multilaboratory, Multicountry Study To Determine Bedaquiline MIC Quality Control  
654 Ranges for Phenotypic Drug Susceptibility Testing. *J Clin Microbiol* **54**, 2956–2962 (2016).
- 655 48. Schön, T. *et al.* Wild-type distributions of seven oral second-line drugs against Mycobacterium  
656 tuberculosis. *Int J Tuberc Lung Dis* **15**, 502–509 (2011).

- 657 49. Veziris, N. *et al.* Rapid emergence of Mycobacterium tuberculosis bedaquiline resistance: lessons to  
658 avoid repeating past errors. *Eur Respir J* **49**, 1601719 (2017).
- 659 50. Battaglia, S. *et al.* Characterization of Genomic Variants Associated with Resistance to Bedaquiline  
660 and Delamanid in Naive Mycobacterium tuberculosis Clinical Strains. *J Clin Microbiol* **58**, (2020).
- 661 51. Zimenkov, D. V. *et al.* Examination of bedaquiline- and linezolid-resistant Mycobacterium tuberculosis  
662 isolates from the Moscow region. *Journal of Antimicrobial Chemotherapy* **72**, 1901–1906 (2017).
- 663 52. Yang, J. S., Kim, K. J., Choi, H. & Lee, S. H. Delamanid, Bedaquiline, and Linezolid Minimum Inhibitory  
664 Concentration Distributions and Resistance-related Gene Mutations in Multidrug-resistant and  
665 Extensively Drug-resistant Tuberculosis in Korea. *Ann Lab Med* **38**, 563–568 (2018).
- 666 53. Ghodousi, A. *et al.* Acquisition of Cross-Resistance to Bedaquiline and Clofazimine following  
667 Treatment for Tuberculosis in Pakistan. *Antimicrob Agents Chemother* **63**, e00915-19,  
668 /aac/63/9/AAC.00915-19.atom (2019).
- 669 54. Nimmo, C. *et al.* Bedaquiline resistance in drug-resistant tuberculosis HIV co-infected patients.  
670 *European Respiratory Journal* (2020) doi:10.1183/13993003.02383-2019.
- 671 55. Wang, G. *et al.* Prevalence and molecular characterizations of seven additional drug resistance among  
672 multidrug-resistant tuberculosis in China: A subsequent study of a national survey. *J Infect* **82**, 371–  
673 377 (2021).
- 674 56. Xu, J. *et al.* Verapamil Increases the Bioavailability and Efficacy of Bedaquiline but Not Clofazimine in  
675 a Murine Model of Tuberculosis. *Antimicrobial Agents and Chemotherapy* **62**, e01692-17.

- 676 57. Pang, Y. *et al.* In Vitro Drug Susceptibility of Bedaquiline, Delamanid, Linezolid, Clofazimine,  
677 Moxifloxacin, and Gatifloxacin against Extensively Drug-Resistant Tuberculosis in Beijing, China.  
678 *Antimicrob Agents Chemother* **61**, e00900-17, e00900-17 (2017).
- 679 58. Consortium, T. Cr. & Fowler, P. W. Epidemiological cutoff values for a 96-well broth microdilution  
680 plate for high-throughput research antibiotic susceptibility testing of *M. tuberculosis*. *medRxiv*  
681 2021.02.24.21252386 (2021) doi:10.1101/2021.02.24.21252386.
- 682 59. Vargas, R. *et al.* The role of epistasis in amikacin, kanamycin, bedaquiline, and clofazimine resistance  
683 in *Mycobacterium tuberculosis* complex. *bioRxiv* 2021.05.07.443178 (2021)  
684 doi:10.1101/2021.05.07.443178.
- 685 60. Merker, M. *et al.* Phylogenetically informative mutations in genes implicated in antibiotic resistance  
686 in *Mycobacterium tuberculosis* complex. *Genome Med* **12**, 27 (2020).
- 687 61. Hecht, M., Bromberg, Y. & Rost, B. Better prediction of functional effects for sequence variants. *BMC*  
688 *Genomics* **16**, S1 (2015).
- 689 62. Kumarevel, T. The MarR Family of Transcriptional Regulators - A Structural Perspective. *Antibiotic*  
690 *Resistant Bacteria - A Continuous Challenge in the New Millennium* (2012) doi:10.5772/28565.
- 691 63. Hong, M., Fuangthong, M., Helmann, J. D. & Brennan, R. G. Structure of an OhrR-ohrA operator  
692 complex reveals the DNA binding mechanism of the MarR family. *Molecular Cell* (2005)  
693 doi:10.1016/j.molcel.2005.09.013.

- 694 64. Makhado, N. A. *et al.* Outbreak of multidrug-resistant tuberculosis in South Africa undetected by  
695 WHO-endorsed commercial tests: an observational study. *The Lancet Infectious Diseases* **18**, 1350–  
696 1359 (2018).
- 697 65. Gröschel, M. I. *et al.* Pathogen-based precision medicine for drug-resistant tuberculosis. *PLoS Pathog*  
698 **14**, e1007297 (2018).
- 699 66. Feuerriegel, S. *et al.* Rapid genomic first- and second-line drug resistance prediction from clinical  
700 Mycobacterium tuberculosis specimens using Deeplex<sup>®</sup>-MycTB. *European Respiratory Journal* (2020)  
701 doi:10.1183/13993003.01796-2020.
- 702 67. Jouet, A. *et al.* Deep amplicon sequencing for culture-free prediction of susceptibility or resistance to  
703 13 anti-tuberculous drugs. *European Respiratory Journal* (2020) doi:10.1183/13993003.02338-2020.
- 704 68. Cabibbe, A. M. *et al.* Application of Targeted Next-Generation Sequencing Assay on a Portable  
705 Sequencing Platform for Culture-Free Detection of Drug-Resistant Tuberculosis from Clinical Samples.  
706 *Journal of Clinical Microbiology* **58**, (2020).
- 707 69. Kumar, S. & Jena, L. Understanding Rifampicin Resistance in Tuberculosis through a Computational  
708 Approach. *Genomics Inform* **12**, 276–282 (2014).
- 709 70. Zhang, Q. *et al.* Uncovering the Resistance Mechanism of Mycobacterium tuberculosis to Rifampicin  
710 Due to RNA Polymerase H451D/Y/R Mutations From Computational Perspective. *Front. Chem.* **7**,  
711 (2019).



- 712 71. Marney, M. W., Metzger, R. P., Hecht, D. & Valafar, F. Modeling the structural origins of drug  
713 resistance to isoniazid via key mutations in Mycobacterium tuberculosis catalase-peroxidase, KatG.  
714 *Tuberculosis* **108**, 155–162 (2018).
- 715 72. Mehmood, A. *et al.* Structural Dynamics Behind Clinical Mutants of PncA-Asp12Ala, Pro54Leu, and  
716 His57Pro of Mycobacterium tuberculosis Associated With Pyrazinamide Resistance. *Front. Bioeng.*  
717 *Biotechnol.* **7**, (2019).
- 718 73. Carter, J. J. *et al.* Prediction of pyrazinamide resistance in Mycobacterium tuberculosis using  
719 structure-based machine learning approaches. *bioRxiv* 518142 (2019) doi:10.1101/518142.
- 720 74. Tunstall, T. *et al.* Combining structure and genomics to understand antimicrobial resistance.  
721 *Computational and Structural Biotechnology Journal* **18**, 3377–3394 (2020).
- 722 75. Karmakar, M. *et al.* Empirical ways to identify novel Bedaquiline resistance mutations in AtpE. *PLOS*  
723 *ONE* **14**, e0217169 (2019).
- 724 76. Dartois, V. The path of anti-tuberculosis drugs: From blood to lesions to mycobacterial cells. *Nature*  
725 *Reviews Microbiology* (2014) doi:10.1038/nrmicro3200.
- 726 77. Strydom, N. *et al.* Tuberculosis drugs' distribution and emergence of resistance in patient's lung  
727 lesions: A mechanistic model and tool for regimen and dose optimization. *PLoS Medicine* (2019)  
728 doi:10.1371/journal.pmed.1002773.
- 729 78. Müller, B., Borrell, S., Rose, G. & Gagneux, S. The heterogeneous evolution of multidrug-resistant  
730 Mycobacterium tuberculosis. *Trends in Genetics* **29**, 160–169 (2013).

- 731 79. van Soolingen, D., Hermans, P. W., de Haas, P. E., Soll, D. R. & van Embden, J. D. Occurrence and  
732 stability of insertion sequences in Mycobacterium tuberculosis complex strains: evaluation of an  
733 insertion sequence-dependent DNA polymorphism as a tool in the epidemiology of tuberculosis.  
734 *Journal of Clinical Microbiology* **29**, 2578–2586 (1991).
- 735 80. Kohl, T. A. *et al.* MTBseq: a comprehensive pipeline for whole genome sequence analysis of  
736 Mycobacterium tuberculosis complex isolates. *PeerJ* **6**, e5895 (2018).
- 737 81. Li, H. *et al.* The Sequence Alignment/Map format and SAMtools. *Bioinformatics* **25**, 2078–2079 (2009).
- 738 82. Iqbal, Z., Caccamo, M., Turner, I., Flicek, P. & McVean, G. De novo assembly and genotyping of variants  
739 using colored de Bruijn graphs. *Nature Genetics* **44**, 226–232 (2012).
- 740 83. Rancoita, P. M. V. *et al.* Validating a 14-Drug Microtiter Plate Containing Bedaquiline and Delamanid  
741 for Large-Scale Research Susceptibility Testing of Mycobacterium tuberculosis. *Antimicrob Agents*  
742 *Chemother* **62**, e00344-18, /aac/62/9/e00344-18.atom (2018).
- 743 84. Pettersen, E. F. *et al.* UCSF Chimera—A visualization system for exploratory research and analysis.  
744 *Journal of Computational Chemistry* **25**, 1605–1612 (2004).
- 745 85. Pires, D. E. V., Blundell, T. L. & Ascher, D. B. MCSM-lig: Quantifying the effects of mutations on protein-  
746 small molecule affinity in genetic disease and emergence of drug resistance. *Scientific Reports* **6**, 1–8  
747 (2016).
- 748 86. Pires, D. E. V., Ascher, D. B. & Blundell, T. L. MCSM: Predicting the effects of mutations in proteins  
749 using graph-based signatures. *Bioinformatics* **30**, 335–342 (2014).

750 87. Decherchi, S., Bottegoni, G., Spitaleri, A., Rocchia, W. & Cavalli, A. BiKi Life Sciences: A New Suite for  
751 Molecular Dynamics and Related Methods in Drug Discovery. *J. Chem. Inf. Model.* **58**, 219–224 (2018).

752
